# Supplementary material
Source: PubMed Central journal article supplement (PMC6129399)
Supplement: NIHMS967171-supplement-1.pdf [file NIHMS967171-supplement-1.pdf]

## An enhanced CRISPR repressor for targeted mammalian gene regulation

**Nan Cher Yeo<sup>1,2, †</sup>, Alejandro Chavez<sup>3,†,\*</sup>, Alissa Lance-Byrne<sup>1</sup>, Yingleong Chan<sup>1,2,Φ</sup>, David Menn<sup>4,Φ</sup>, Denitsa Milanova<sup>1,2,Φ</sup>, Chih-Chung Kuo<sup>5,6,Φ</sup>, Xiaoge Guo<sup>1,2</sup>, Sumana Sharma<sup>7</sup>, Angela Tung<sup>1</sup>, Ryan J. Cecchi<sup>1</sup>, Marcelle Tuttle<sup>1</sup>, Swechcha Pradhan<sup>4</sup>, Elaine T Lim<sup>1,2</sup>, Noah Davidsohn<sup>1,2</sup>, Mo R. Ebrahimkhani<sup>4,8</sup>, James J. Collins<sup>1,9,10,11,11</sup>, Nathan E. Lewis<sup>5,6,13</sup>, Samira Kiani<sup>4,\*</sup>, and George M. Church<sup>1,2,\*</sup>**

<sup>1</sup>Wyss Institute for Biologically Inspired Engineering, Harvard University, Cambridge, Massachusetts, USA.

<sup>2</sup>Department of Genetics, Harvard Medical School, Boston, Massachusetts, USA.

<sup>3</sup>Department of Pathology and Cell Biology, Columbia University College of Physicians and Surgeons, New York, New York, USA

<sup>4</sup>School of Biological and Health Systems Engineering, Ira. A Fulton Schools of Engineering, Arizona State University, Tempe, Arizona, USA.

<sup>5</sup>Department of Bioengineering, University of California, San Diego, USA.

<sup>6</sup>Novo Nordisk Foundation Center for Biosustainability at the University of California, San Diego, USA.

<sup>7</sup>Cell Surface Signalling Laboratory, Wellcome Trust Sanger Institute, Cambridge CB101SA, United Kingdom.

<sup>8</sup>Division of Gastroenterology and Hematology, Mayo Clinic College of Medicine and Science, Phoenix, Arizona, USA.

<sup>9</sup>Institute for Medical Engineering & Science, Massachusetts Institute of Technology, Cambridge, Massachusetts, USA.

<sup>10</sup>Synthetic Biology Center, Massachusetts Institute of Technology, Cambridge, Massachusetts, USA.

<sup>11</sup>Department of Biological Engineering, Massachusetts Institute of Technology, Cambridge, Massachusetts, USA.

<sup>12</sup>Broad Institute of MIT and Harvard, Cambridge, Massachusetts, USA.

<sup>13</sup>Department of Pediatrics, University of California, San Diego, USA

†Co-first authors

ΦThese authors contributed equally to the manuscript

\*Correspondence can be addressed to:

Alejandro Chavez

E-mail: [ac4304@cumc.columbia.edu](mailto:ac4304@cumc.columbia.edu)

Samira Kiani

E-mail: [samira.Kiani@asu.edu](mailto:samira.Kiani@asu.edu)

George M. Church

E-mail: [gchurch@genetics.med.harvard.edu](mailto:gchurch@genetics.med.harvard.edu)

**Supplementary Table 1** Sequences of dCas9-Krab and dCas9-KRAB-MeCP2

>dCas9-KRAB

Labels: **dCas9**; **SV40 nucleus localization signal (NLS)**; **KRAB**; glycine serine-rich linker (**bold**); stop codon (*italic*)

```
ATGGACAAGAAGTACTCCATTGGGCTCGCTATCGGCACAAACAGCGTCCGGCTGGGCCGTCA
TTACGGACGAGTACAAGGTGCCGAGCAAAAAATTCAAAGTTCTGGGCAATACCGATCGCCA
CAGCATAAAGAAGAACCCTCATTGGCGCCCTCTGTTCGACTCCGGGGAGACGGCCGAAGC
CACGCGGCTCAAAAGAACAGCACGGCGCAGATATACCCGCAGAAAGAATCGGATCTGCTAC
CTGCAGGAGATCTTTAGTAATGAGATGGCTAAGGTGGATGACTCTTTCTTCCATAGGCTGGA
GGAGTCTTTTTGGTGGAGGAGGATAAAAAGCACGAGCGCCACCCAATCTTTGGCAATATC
GTGGACGAGGTGGCGTACCATGAAAAGTACCCAACCATATATCATCTGAGGAAGAAGCTTG
TAGACAGTACTGATAAGGCTGACTTGCGGTTGATCTATCTCGCGCTGGCGCATATGATCAA
TTTCGGGGACACTTCCTCATCGAGGGGGACCTGAACCCAGACAACAGCGATGTGCAAAACT
CTTTATCCAAGTGGTTGAGACTTACAATCAGCTTTTCGAAGAGAACCCGATCAACGCATCCG
GAGTTGACGCCAAAGCAATCCTGAGCGCTAGGCTGTCCAAATCCCAGCGGCTCGAAAACCT
CATCGCACAGCTCCCTGGGGAGAAGAAGACGGCCCTGTTTGGTAATCTTATCGCCCTGTCA
CTCGGGCTGACCCCAACTTTAAATCTAACTTCGACCTGGCCGAAGATGCCAAGCTTCAACT
GAGCAAAGACACCTACGATGATGATCTCGACAATCTGCTGGCCAGATCGGCGACCAGTAC
GCAGACCTTTTTTTGGCGGCAAAGAACCTGTCAGACGCCATTCTGCTGAGTGATATTCTGCG
AGTGAACACGGAGATCACCAAAGCTCCGCTGAGCGCTAGTATGATCAAGCGCTATGATGAG
CACCACCAAGACTTGACTTTGCTGAAGGCCCTTGTGACAGCAACTGCCTGAGAAGTACAA
GGAAATTTTCTTCGATCAGTCTAAAATGGCTACGCCGGATACATTGACGGCGGAGCAAGCC
AGGAGGAATTTTACAAATTTATTAAGCCCATCTTGAAAAAATGGACGGCACCGAGGAGCTG
CTGGTAAAGCTTAACAGAGAAGATCTGTTGCGCAAACAGCGCACTTTGACAATGGAAGCAT
CCCCACCAGATTCACCTGGGCGAACTGCACGCTATCCTCAGGCGGCAAGAGGATTTCTAC
CCTTTTTTGAAAGATAACAGGGAAAAGATTGAGAAAATCCTCACATTTGCGATACCCTACTAT
GTAGGCCCCCTCGCCCGGGGAAATTCCAGATTGCGCTGGATGACTCGCAAATCAGAAGAGA
CCATCACTCCCTGGAACCTTCGAGGAAGTCGTGGATAAGGGGGCCTCTGCCAGTCCTTCAT
CGAAAGGATGACTAACTTTGATAAAAATCTGCCTAACGAAAAGGTGCTTCTAAACACTCTCT
GCTGTACGAGTACTTCACAGTTTATAACGAGCTCACCAAGGTCAAATACGTCACAGAAGGGA
TGAGAAAGCCAGCATTCTGTCTGGAGAGCAGAAGAAAGCTATCGTGGACCTCCTCTTCAA
GACGAACCGGAAAAGTTACCGTGAAACAGCTCAAAGAAGACTATTTCAAAAAGATTGAATGTT
TCGACTCTGTTGAAATCAGCGGAGTGGAGGATCGCTTCAACGCATCCCTGGGAACGTATCA
CGATCTCCTGAAAATCATTAAAGACAAGGACTTCCTGGACAATGAGGAGAACGAGGACATTC
TTGAGGACATTGTCCTCACCTTACGTTGTTTGAAGATAGGGAGATGATTGAAGAACGCTTG
AAAATTACGCTCATCTCTTCGACGACAAAGTCATGAAACAGCTCAAGAGGCGCCGATATAC
AGGATGGGGGCGGCTGTCAAGAAAAGTATCAATGGGATCCGAGACAAGCAGAGTGGAAA
GACAATCCTGGATTTTCTTAAGTCCGATGGATTTGCCAACCAGGAACTTCATGCAGTTGATCC
ATGATGACTCTCACCTTTAAGGAGGACATCCAGAAAGCACAAGTTTCTGGCCAGGGGA
CAGTCTTACGAGCACATCGCTAATCTTGCAGGTAGCCAGCTATCAAAAAGGGAATACTGC
AGACCGTTAAGGTCGTGGATGAACCTCGTCAAAGTAATGGGAAGGCATAAGCCCGAGAATAT
CGTTATCGAGATGGCCCGAGAGAACCAAACCTACCCAGAAGGGACAGAAGAACAGTAGGGAA
AGGATGAAGAGGATTGAAGAGGGTATAAAAGAACTGGGGTCCCAAATCCTTAAGGAACACC
CAGTTGAAAACACCCAGCTTCAGAATGAGAAGCTCTACCTGTACTACCTGCAGAACGGCAG
GGACATGTACGTGGATCAGGAACTGGACATCAATCGGCTCTCCGACTACGACGTGGCTGCT
ATCGTGCCCCAGTCTTTTCTCAAAGATGATTCTATTGATAATAAAGTGTTGACAAGATCCGAT
AAAgcTAGAGGGAAGAGTGATAACGTCCCCTCAGAAGAAGTTGTCAAGAAAATGAAAAATTAT
TGCGCGCAGCTGCTGAACGCCAACTGATCACACAACGGAAGTTGATAATCTGACTAAGG
CTGAACGAGGTGGCCTGTCTGAGTTGGATAAAGCCGGCTTCATCAAAGGCAGCTTGTGGA
GACACGCCAGATACCAAGCACGTGGCCCAAATTCTCGATTACGCATGAACACCAAGTAC
GATGAAAATGACAACTGATTTCGAGAGGTGAAAGTTACTCTGAAGTCTAAGCTGGTCTC
AGATTTAGAAAGGACTTTAGTTTTATAAGGTGAGAGAGATCAACAATTACCACCATGCGC
ATGATGCCTACCTGAATGCAGTGGTAGGCACTGCACCTTATCAAAAATATCCCAAGCTTGAA
```

TCTGAATTTGTTACGGAGACTATAAAGTGTACGATGTTAGGAAAATGATCGCAAAGTCTGAG  
 CAGGAAATAGGCAAGGCCACCGCTAAGTACTTCTTTTACAGCAATATTATGAATTTTTTCAAG  
 ACCGAGATTACACTGGCCAATGGAGAGATTCGGAAGCGACCACTTATCGAAACAAACGGAG  
 AAACAGGAGAAATCGTGTGGGACAAGGGTAGGGATTTCCGCGACAGTCCGGAAGGTCTGTCT  
 CATGCCGCAGGTGAACATCGTTAAAAAGACCGAAGTACAGACCGGAGGCTTCTCCAAGGAA  
 AGTATCCTCCCAAAAGGAACAGCGACAAGCTGATCGCACGCAAAAAAGATTGGGACCCCA  
 AGAAATACGGCGGATTTCGATTCTCTACAGTTCGTTACAGTGTACTGGTTGTGGCCAAAGTG  
 GAGAAAGGGAAGTCTAAAAAACTCAAAGCGTCAAGGAACTGCTGGGCATCACAATCATGG  
 AGCGATCAAGCTTCGAAAAAAACCCCATCGACTTTCTCGAGGCGAAAGGATATAAAGAGGTC  
 AAAAAAGACCTCATCATTAAGCTTCCAAGTACTCTCTCTTTGAGCTTGAAAACGGCCGGAA  
 ACGAATGCTCGCTAGTGCGGGCGAGCTGCAGAAAGGTAACGAGCTGGCACTGCCCTCTAAA  
 TACGTTAATTTCTTGTATCTGGCCAGCCACTATGAAAAGCTCAAAGGGTCTCCCGAAGATAAT  
 GAGCAGAAGCAGCTGTTCTGGAACAACACAAACTACCTTGATGAGATCATCGAGCAAAT  
 AAGCGAATTCTCCAAAAGAGTGATCCTCGCCGACGCTAACCTCGATAAGGTGCTTTCTGCTT  
 ACAATAAGCACAGGGATAAGCCCATCAGGGAGCAGGCAGAAAACATTATCCACTTGTTTACT  
 CTGACCACTTGGGCGCCTGCAGCCTTCAAGTACTTCGACACCACCATAGACAGAAAAGC  
 GTACACCTCTACAAAGGAGGTCTTGACGCCACACTGATTATCATAGTCAATTACGGGGCT  
 CTATGAAACAAGAATCGACCTCTCTCAGCTCGGTGGAGACAGCAGGGCTGAC**CCCAAGAAG**  
**AAGAGGAAGGTG****AGTGGTGGAGGAAGTGGCGGGTCAGGGTCG**ATGGACGCGAAATCACTT  
 ACGGCATGGTCGAGAACA**CTGGTTACGTTCAAGGACGTGTTTGTGGACTTTACACGTGAGG**  
**AGTGGAAATTGCTGGATACTGCGCAACAAATTGTGTATCGAAATGTCATGCTTGAGAATTAC**  
**AAGAACCTCGTCAGTCTCGGATACCAGTTGACGAAACCGGATGTGATCCTTAGGCTCGAAAA**  
**GGGGGAAGAACCTTGGCTGGTA***TAG*

>dCas9-KRAB-MeCP2

Labels: dCas9; SV40 nucleus localization signal (NLS); KRAB; TRD domain of MeCP2; glycine serine-rich linker (bold); stop codon (italic)

ATGGACAAGAAGTACTCCATTGGGCTCGCTATCGGCACAAACAGCGTCGGCTGGGCCGTCA  
 TTACGGACGAGTACAAGGTGCCGAGCAAAAAATTCAAAGTTCTGGGCAATACCGATCGCCA  
 CAGCATAAAGAAGAACCTCATTGGCGCCCTCTGTTTCCGACTCCGGGGAGACGGCCGAAGC  
 CACGCGGCTCAAAGAAGACAGCACGGCGCAGATATACCCGCAGAAAGAATCGGATCTGCTAC  
 CTGCAGGAGATCTTTAGTAATGAGATGGCTAAGGTGGATGACTCTTTCTTCCATAGGCTGGA  
 GGAGTCTTTTTGGTGGAGGAGGATAAAAAGCACGAGCGCCACCCAATCTTTGGCAATATC  
 GTGGACGAGGTGGCGTACCATGAAAAGTACCCAACCATATATCATCTGAGGAAGAAGCTTG  
 TAGACAGTACTGATAAGGCTGACTTGCGGTTGATCTATCTCGCGCTGGCGCATATGATCAA  
 TTTCCGGGACACTTCTCATCGAGGGGGACCTGAACCCAGACAACAGCGATGTGATAAACT  
 CTTTATCCA**ACTGGTT**CAGACTTACAATCAGCTTTT**CGAAGAGA**ACCCGATCAACGCATCCG  
 GAGTTGACGCCAAAGCAATCCTGAGCGCTAGGCTGTCCAAATCCCGGGCGGCTCGAAAACCT  
 CATCGCACAGCTCCCTGGGGAGAAGAAGAAGCGCCTGTTTGGTAATCTTATCGCCCTGTCA  
 CTCGGGCTGACCCCAACTTTAAATCTAACTTCGACCTGGCCGAAGATGCCAAGCTTCAACT  
 GAGCAAAGACACCTACGATGATGATCTCGACAATCTGCTGGCCAGATCGGCGACCAGTAC  
 GCAGACCTTTTTTGGCGGCAAAGAACCTGTCAGACGCCATTCTGCTGAGTGATATTCTGCG  
 AGTGAACACGGAGATCACCAAAGCTCCGCTGAGCGCTAGTATGATCAAGCGCTATGATGAG  
 CACCACCAAGACTTGACTTTGCTGAAGGCCCTTGTCAGACAGCAACTGCCTGAGAAGTACAA  
 GAAATTTTCTTCGATCAGTCTAAAAATGGCTACGCCGGATACATTGACGGCGGAGCAAGCC  
 AGGAGGAATTTTACAAATTTATAAGCCCATCTTGAAAAAATGGACGGCACCGGAGGAGCTG  
 CTGGTAAAGCTTAACAGAGAAGATCTGTTGCGCAACAGCGCACTTTTCGACAATGGAAGCAT  
 CCCCCACCAGATTCACCTGGGCGAACTGCACGCTATCCTCAGGCGGCAAGAGGATTTCTAC  
 CCTTTTTGAAAGATAACAGGGAAAAGATTGAGAAAATCCTCACATTTTCGGATACCCTACTAT  
 GTAGGCCCCCTCGCCCGGGGAAATTCCAGATTGCGGTGGATGACTCGCAAATCAGAAGAGA

CCATCACTCCCTGGAACCTCGAGGAAGTCGTGGATAAGGGGGCCTCTGCCAGTCCTTCAT  
CGAAAGGATGACTAACTTTGATAAAAATCTGCCTAACGAAAAGGTGCTTCCTAAACTCTCT  
GCTGTACGAGTACTTCACAGTTTATAACGAGCTCACCAAGGTCAAATACGTCACAGAAGGGA  
TGAGAAAGCCAGCATTCTGTCTGGAGAGCAGAAGAAAGCTATCGTGGACCTCCTCTTCAA  
GACGAACCGGAAAAGTTACCGTGAAACAGCTCAAAGAAGACTATTTCAAAAAGATTGAATGTT  
TCGACTCTGTTGAAATCAGCGGAGTGGAGGATCGCTTCAACGCATCCCTGGGAACGTATCA  
CGATCTCCTGAAAATCATTAAAGACAAGGACTTCCTGGACAATGAGGAGAACGAGGACATT  
TTGAGGACATTGTCCTCACCTTACGTTGTTTGAAGATAGGGAGATGATTGAAGAACGCTTG  
AAAACCTACGCTCATCTCTTCGACGACAAAGTCATGAAACAGCTCAAGAGGCGCCGATATA  
AGGATGGGGGCGGCTGTCAAGAAAAGTCAATGGGATCCGAGACAAGCAGAGTGGAAA  
GACAATCCTGGATTTTCTTAAGTCCGATGGATTTGCCAACCGGAACTTCATGCAGTTGATCC  
ATGATGACTCTCTCACCTTTAAGGAGGACATCCAGAAAGCACAAGTTTCTGGCCAGGGGA  
CAGTCTTACGAGCACATCGCTAATCTTGCAGGTAGCCAGCTATCAAAAAGGGAATACTGC  
AGACCGTTAAGGTCGTGGATGAACTCGTCAAAGTAATGGGAAGGCATAAGCCCGAGAATAT  
CGTTATCGAGATGGCCCGAGAGAACCAAACTACCCAGAAGGGACAGAAGAACAGTAGGGAA  
AGGATGAAGAGGATTGAAGAGGGTATAAAAAGAACTGGGGTCCCAAATCCTTAAGGAACACC  
CAGTTGAAAACACCCAGCTTCAGAATGAGAAGCTCTACCTGTACTACCTGCAGAACGGCAG  
GGACATGTACGTGGATCAGGAACTGGACATCAATCGGCTCTCCGACTACGACGTGGCTGCT  
ATCGTGCCCCAGTCTTTTCTCAAAGATGATTCTATTGATAATAAAGTGTTGACAAGATCCGAT  
AAAAGcTAGAGGGAAGAGTGATAACGTCCCCTCAGAAGAAGTTGTCAAGAAAATGAAAAATTAT  
TGGCGGCAGCTGCTGAACGCCAACTGATCACACAACGGAAGTTCGATAATCTGACTAAGG  
CTGAACGAGGTGGCCTGTCTGAGTTGGATAAAGCCGGCTTCATCAAAGGCAGCTTGTTGA  
GACACGCCAGATACCAAGCACGTGGCCCAAATTCTCGATTACGCATGAACACCAAGTAC  
GATGAAAATGACAACTGATTGAGAGGTGAAAGTTATTACTCTGAAGTCTAAGCTGGTCTC  
AGATTTAGAAAAGGACTTTTCAAGTTTATAAGGTGAGAGAGATCAACAATTACCACCATGCGC  
ATGATGCCTACCTGAATGCAGTGGTAGGCACTGCACCTTATCAAAAATATCCCAAGCTTGAA  
TCTGAATTTGTTACGGAGACTATAAAGTGTACGATGTTAGGAAAATGATCGCAAAGTCTGAG  
CAGGAAATAGGCAAGGCCACCGCTAAGTACTTCTTTTACAGCAATATTATGAATTTTTTCAAG  
ACCGAGATTACACTGGCCAATGGAGAGATTCGGAAGCGACCACTTATCGAAACAAACGGAG  
AAACAGGAGAAATCGTGTGGGACAAGGGTAGGGATTTGCGGACAGTCCGGAAGGTCTCTGTC  
CATGCCGACGGTGAACATCGTTAAAAAGACCGAAGTACAGACCGGAGGCTTCTCCAAGGAA  
AGTATCCTCCCGAAAAGGAACAGCGACAAGCTGATCGCACGCAAAAAGATTGGGACCCCA  
AGAAATACGGCGGATTCGATTCTCTACAGTTCGCTTACAGTGTACTGGTTGTGGCCAAAGTG  
GAGAAAGGGAAGTCTAAAAAACTCAAAGCGTCAAGGAACTGCTGGGCATCACAATCATGG  
AGCGATCAAGCTTCGAAAAAAACCCCATCGACTTTCTCGAGGCGAAAGGATATAAAGAGGTC  
AAAAAGACCTCATCATTAAAGCTTCCCAAGTACTCTCTCTTTGAGCTTGAAAACGGCCGGAA  
ACGAATGCTCGTAGTGCGGGCGAGCTGCAGAAAGGTAACGAGCTGGCACTGCCCTCTAAA  
TACGTTAATTTCTGTATCTGGCCAGCCACTATGAAAAGCTCAAAGGGTCTCCCGAAGATAAT  
GAGCAGAAGCAGCTGTTTCGTGGAACAACACAAACTACCTTGATGAGATCATCGAGCAAAT  
AAGCGAATTCTCAAAAAGAGTGATCCTCGCCGACGCTAACCTCGATAAGGTGCTTTCTGCTT  
ACAATAAGCACAGGGATAAGCCCATCAGGGAGCAGGAGCAGAAAACATTATCCACTTGTTTACT  
CTGACCAACTTGGGCGCGCCTGCAGCCTTCAAGTACTTCGACACCACCATAGACAGAAAGC  
GGTACACCTCTACAAAGGAGGTCTGACGCCACACTGATTCATCAGTCAATTACGGGGCT  
CTATGAAACAAGAATCGACCTCTCTCAGCTCGGTGGAGACAGCAGGGCTGACCCCAAGAAG  
AAGAGGAAGGTGAGTGGTGGAGGAAGTGGCGGGTCAAGGTGATGGACGCGAAATCACTT  
ACGGCATGGTCGAGAACAAGTGGTTACGTTCAAGGACGTGTTTGTGGACTTTACACGTGAGG  
AGTGGAAATTGCTGGATACTGCGCAACAAATTGTGTATCGAAATGTCATGCTTGAGAATTAC  
AAGAACCCTCGTCAGTCTCGGATACCAGTTGACGAAACCGGATGTGATCCTTAGGCTCGAAAA  
GGGGGAAGAACCTTGGCTGGTATCGGGAGGTGGTTCCGGTGGCTCTGGATCAAGCCAAA  
GAAGAAACGGAAGGTGGAAGCCTCAGTGCAGGTGAAAAGGGTGTGGAAAAATCCCCGG  
CAAACCTCTCGTGAAGATGCCCTTCCAGGCTTCCCCTGGCGGAAAAGGTGAAGGGGGTGG  
CGCAACCACATCTGCCAGGTCATGGTCATCAAGCGACCTGGAAGGAAAAGAAAGGCCGAG  
GCTGACCCTCAGGCCATTCAAAGAAACGGGACGCAAGCCAGGGTCCGTGGTTCGAGCT  
GCAGCAGCTGAGGCTAAGAAAAGGCAGTGAAGGAAAGCTCCATCCGACGTGTGCAGGAG  
ACTGTCCTGCCCATCAAGAAGAGGAAGACTAGGGAGACCGTGTCCATCGAGGTCAAAGAAG  
TGGTCAAGCCCCTGCTCGTGTCCACCCTGGGCGAAAATCTGGAAGGGGCTCAAACATG

CAAGTACCTGGACGGAAAAGCAAGGAGTCTAGTCCAAAGGGGCGCTCAAGCTCCGTTCT  
AGTCCCCCTAAAAAGGAACACCATCACCATCACCATCACGCCGAGTCTCCTAAGGCTCCTAT  
GCCACTGCTCCACCACCTCCACCACCTGAGCCACAGTCAAGCGAAGACCCCATCAGCCCA  
CCCGAGCCTCAGGATCTGTCCTCTAGTATTTGCAAAGAGGAAAAGATGCCCAGAGCAGGCA  
GCCTGGAGAGTGATGGCTGTCCAAAAGAACCCGCCAAGACCCAGCCTATGGTGGCAGCCG  
CTGCAACTACCACCACAACCACA ACTACCACAGTGGCCGAAAAATACAAGCATCGCGGCGA  
GGCGAACGAAAGGACATTGTGTCAAGTCCATGCCCAGACCTAACCGGGAGGAACCAGT  
CGATAGTAGGACACCCGTGACTGAGAGAGTCTCA TAG

**Supplementary Table 2** A list of differentially expressed (DE) genes with log<sub>2</sub> FC above 1.5 threshold in RNA-seq experiment. (Note that all of these genes have positive log<sub>2</sub> FC, which corresponds to increased transcriptional activity).

| <b>dCas9</b>                |                          |                           |                |            |
|-----------------------------|--------------------------|---------------------------|----------------|------------|
|                             | <b>Log<sub>2</sub>FC</b> | <b>Log<sub>2</sub>CPM</b> | <b>P-Value</b> | <b>FDR</b> |
| <b>HSPA6<sup>1</sup></b>    | 6.57                     | 8.3400                    | 2.00E-25       | 2.74E-21   |
| <b>DNAJB1<sup>1</sup></b>   | 2.24                     | 8.2800                    | 6.09E-23       | 4.16E-19   |
| <b>HSPA7<sup>1</sup></b>    | 7.28                     | 2.1290                    | 9.68E-16       | 4.41E-12   |
| <b>HSPA1A<sup>1</sup></b>   | 4.69                     | 2.7660                    | 4.75E-13       | 1.62E-09   |
| <b>CRYAB<sup>1</sup></b>    | 6.55                     | 2.0320                    | 4.09E-12       | 1.12E-08   |
| <b>ANKRD1<sup>2</sup></b>   | 2.54                     | 2.3950                    | 4.02E-11       | 9.16E-08   |
| <b>ZFAND2A<sup>1</sup></b>  | 1.65                     | 4.2370                    | 3.74E-10       | 7.29E-07   |
| <b>ATF3<sup>2</sup></b>     | 1.11                     | 6.0300                    | 2.30E-07       | 3.93E-04   |
| <b>DNAH17<sup>1</sup></b>   | 1.74                     | 3.5590                    | 2.92E-07       | 4.44E-04   |
| <b>SCG2</b>                 | 4.11                     | 0.1960                    | 1.35E-05       | 1.75E-02   |
| <b>VGf<sup>1</sup></b>      | 2.33                     | 1.9290                    | 1.41E-05       | 1.75E-02   |
| <b>FOS<sup>2</sup></b>      | 1.41                     | 2.9560                    | 1.65E-05       | 1.88E-02   |
| <b>GDF15<sup>1</sup></b>    | 2.43                     | 1.7580                    | 2.68E-05       | 2.82E-02   |
| <b>dCas9-KRAB</b>           |                          |                           |                |            |
|                             | <b>Log<sub>2</sub>FC</b> | <b>Log<sub>2</sub>CPM</b> | <b>P-Value</b> | <b>FDR</b> |
| <b>HSPA6<sup>1</sup></b>    | 7.19                     | 8.3398                    | 2.26E-26       | 2.65E-22   |
| <b>DNAJB1<sup>1</sup></b>   | 2.62                     | 8.2801                    | 3.88E-26       | 2.65E-22   |
| <b>HSPA1A<sup>1</sup></b>   | 6.36                     | 2.7657                    | 8.82E-21       | 4.02E-17   |
| <b>HMOX1</b>                | 2.07                     | 5.5632                    | 1.31E-20       | 4.48E-17   |
| <b>CRYAB<sup>1</sup></b>    | 8.14                     | 2.0315                    | 2.86E-18       | 7.82E-15   |
| <b>HSPA7<sup>1</sup></b>    | 7.82                     | 2.1293                    | 5.79E-18       | 1.32E-14   |
| <b>VGf<sup>1</sup></b>      | 4.6                      | 1.9288                    | 4.29E-16       | 8.37E-13   |
| <b>ZFAND2A<sup>1</sup></b>  | 2                        | 4.2367                    | 6.13E-14       | 1.05E-10   |
| <b>PPP1R15A<sup>3</sup></b> | 1.47                     | 5.3442                    | 2.88E-12       | 4.36E-09   |
| <b>GDF15<sup>1</sup></b>    | 4.08                     | 1.7576                    | 6.69E-12       | 9.13E-09   |
| <b>DNAH17<sup>1</sup></b>   | 2.34                     | 3.5595                    | 2.04E-11       | 2.53E-08   |
| <b>CLU</b>                  | 1.49                     | 4.588                     | 6.38E-11       | 7.26E-08   |
| <b>SERPINH1</b>             | 1.24                     | 6.3749                    | 1.08E-10       | 1.14E-07   |
| <b>FOXJ1<sup>3</sup></b>    | 6.5                      | 0.4447                    | 1.47E-10       | 1.43E-07   |
| <b>ANXA1</b>                | 2.55                     | 1.9991                    | 1.02E-09       | 9.33E-07   |
| <b>FOS<sup>2</sup></b>      | 1.86                     | 2.9564                    | 3.62E-09       | 3.09E-06   |
| <b>NCRNA00306</b>           | 3.6                      | 0.6114                    | 1.87E-08       | 1.50E-05   |
| <b>CSRNP1</b>               | 1.32                     | 4.5789                    | 2.82E-08       | 2.14E-05   |
| <b>ANKRD1<sup>2</sup></b>   | 2                        | 2.3946                    | 1.28E-07       | 9.22E-05   |

|                         |                          |                           |                |            |
|-------------------------|--------------------------|---------------------------|----------------|------------|
| ACHE                    | 1.89                     | 2.0935                    | 2.28E-06       | 1.56E-03   |
| SCG2                    | 4.28                     | 0.1963                    | 4.42E-06       | 2.75E-03   |
| ATF3 <sup>2</sup>       | 1.02                     | 6.0304                    | 4.42E-06       | 2.75E-03   |
| HLA-G                   | 3.54                     | -0.0433                   | 5.02E-06       | 2.98E-03   |
| INPP5D <sup>3</sup>     | 2.93                     | 0.983                     | 5.69E-06       | 3.24E-03   |
| RELB                    | 1.56                     | 2.6216                    | 6.66E-06       | 3.64E-03   |
| PNLDC1                  | 3.2                      | 0.0906                    | 8.19E-06       | 4.15E-03   |
| CYP4F3                  | 7.12                     | -0.4274                   | 8.21E-06       | 4.15E-03   |
| MMP12                   | 4.58                     | -0.6846                   | 9.52E-06       | 4.64E-03   |
| TUBB3                   | 1.15                     | 3.9455                    | 1.39E-05       | 6.53E-03   |
| PLK2                    | 1.23                     | 3.6057                    | 1.52E-05       | 6.92E-03   |
| IRX4                    | 2.55                     | 0.425                     | 2.43E-05       | 1.07E-02   |
| DUSP8                   | 1.22                     | 3.6476                    | 3.69E-05       | 1.57E-02   |
| FERMT3                  | 2.22                     | 0.6882                    | 5.66E-05       | 2.34E-02   |
| ACRC                    | 1.63                     | 1.6191                    | 7.17E-05       | 2.88E-02   |
| IL11                    | 1.92                     | 0.9971                    | 9.89E-05       | 3.86E-02   |
| <b>dCas9-KRAB-MeCP2</b> |                          |                           |                |            |
|                         | <b>Log<sub>2</sub>FC</b> | <b>Log<sub>2</sub>CPM</b> | <b>P-Value</b> | <b>FDR</b> |
| HSPA6 <sup>1</sup>      | 6.7                      | 8.34                      | 1.27E-25       | 1.73E-21   |
| DNAJB1 <sup>1</sup>     | 2.24                     | 8.28                      | 6.26E-23       | 4.28E-19   |
| HSPA1A <sup>1</sup>     | 5.8                      | 2.766                     | 4.26E-18       | 1.94E-14   |
| HSPA7 <sup>1</sup>      | 6.99                     | 2.129                     | 2.26E-14       | 7.71E-11   |
| CRYAB <sup>1</sup>      | 6.59                     | 2.032                     | 4.73E-12       | 1.29E-08   |
| DNAH17 <sup>1</sup>     | 2.43                     | 3.559                     | 8.96E-12       | 2.04E-08   |
| INPP5D <sup>3</sup>     | 3.96                     | 0.983                     | 1.65E-09       | 3.23E-06   |
| GDF15 <sup>1</sup>      | 3.29                     | 1.758                     | 2.00E-08       | 3.41E-05   |
| CYP4F3                  | 7.81                     | -0.427                    | 3.40E-07       | 5.16E-04   |
| FOXJ1 <sup>3</sup>      | 5.41                     | 0.445                     | 4.53E-07       | 6.19E-04   |
| ZFAND2A <sup>1</sup>    | 1.33                     | 4.237                     | 1.24E-06       | 1.54E-03   |
| PPP1R15A <sup>3</sup>   | 1.09                     | 5.344                     | 1.46E-06       | 1.66E-03   |
| VGF <sup>1</sup>        | 2.55                     | 1.929                     | 2.43E-06       | 2.56E-03   |
| NCRNA00306              | 2.75                     | 0.611                     | 2.56E-05       | 2.50E-02   |
| DUSP8 <sup>3</sup>      | 1.23                     | 3.648                     | 3.32E-05       | 2.92E-02   |
| PLA2G4C                 | 1.89                     | 1.495                     | 3.55E-05       | 2.92E-02   |
| ANXA1                   | 1.76                     | 1.999                     | 3.64E-05       | 2.92E-02   |

Note: <sup>1</sup> indicates genes common to all three repressor groups, <sup>2</sup> indicates common genes between dCas9 and dCas9-KRAB, and <sup>3</sup> indicates common genes between dCas9-KRAB and dCas9-KRAB-MeCP2. FC = fold-change, CPM = counts per million, FDR = false discovery rate. n=2 biologically independent samples. For DE analyses, see **Supplementary Note 2**.

**Supplementary Table 3.** A list of down-regulated genes identified in RNA-seq experiment. Note that all of these genes have log<sub>2</sub> FC below 1.5 threshold.

| <b>dCas9-KRAB</b>            |                          |                           |                |            |
|------------------------------|--------------------------|---------------------------|----------------|------------|
|                              | <b>Log<sub>2</sub>FC</b> | <b>Log<sub>2</sub>CPM</b> | <b>P-Value</b> | <b>FDR</b> |
| <b>EIF5B<sup>1</sup></b>     | -0.59                    | 5.4743                    | 6.88E-07       | 2.54E-04   |
| <b>TMEM44</b>                | -1.329                   | 2.2374                    | 5.03E-06       | 1.37E-03   |
| <b>HNRNPA2B1<sup>1</sup></b> | -0.463                   | 8.6101                    | 1.72E-05       | 3.86E-03   |
| <b>HNRNPD</b>                | -0.451                   | 5.9149                    | 2.69E-05       | 5.74E-03   |
| <b>HIST1H2AE</b>             | -0.822                   | 3.4547                    | 4.20E-05       | 8.44E-03   |
| <b>TAF15</b>                 | -0.497                   | 4.9187                    | 1.88E-04       | 3.02E-02   |
| <b>NFXL1</b>                 | -0.444                   | 5.0202                    | 2.40E-04       | 3.62E-02   |
| <b>ODZ3</b>                  | -0.452                   | 4.8766                    | 2.44E-04       | 3.62E-02   |
| <b>dCas9-KRAB-MeCP2</b>      |                          |                           |                |            |
|                              | <b>Log<sub>2</sub>FC</b> | <b>Log<sub>2</sub>CPM</b> | <b>P-Value</b> | <b>FDR</b> |
| <b>EIF5B<sup>1</sup></b>     | -0.63                    | 5.474                     | 2.87E-07       | 1.87E-04   |
| <b>HNRNPA2B1<sup>1</sup></b> | -0.427                   | 8.61                      | 5.75E-05       | 1.96E-02   |
| <b>LRRFIP1</b>               | -0.398                   | 5.767                     | 1.54E-04       | 4.34E-02   |
| <b>PRPF19</b>                | -0.359                   | 6.983                     | 1.55E-04       | 4.34E-02   |
| <b>RNU6ATAC</b>              | -0.662                   | 3.595                     | 1.67E-04       | 4.36E-02   |

Note: <sup>1</sup> indicates genes down-regulated in both dCas9-KRAB and dCas9-KRAB-MeCP2 groups. None of the down-regulated genes showed a near sequence match to the *CXCR4* targeting sgRNA. No downregulated genes were observed in the dCas9 group. FC = fold-change, CPM = counts per million, FDR = false discovery rate. n=2 biologically independent samples. For DE analyses, see **Supplementary Note 2**.

**Supplementary Table 4** Mean fold changes of all essential gene-targeting sgRNAs and *p*-values for statistical comparison between essential and non-essential guides in HAP1 lethality screen.

| Experiment               | Mean essential guides<br>log <sub>2</sub> OR | P-value <sup>#</sup> |
|--------------------------|----------------------------------------------|----------------------|
| dCas9_day0               | -0.008                                       | 0.1329               |
| dCas9_day7               | 0.001                                        | 0.669                |
| dCas9_day14              | -0.001                                       | 0.6289               |
| dCas9-KRAB_day0          | -0.015                                       | 0.005708             |
| dCas9-KRAB _day7         | -0.056                                       | 1.83E-07             |
| dCas9-KRAB _day14        | -0.081                                       | 5.41E-19             |
| dCas9-KRAB-MeCP2_day0    | 0.031                                        | 0.9996               |
| dCas9-KRAB-MeCP2_day7*   | -2.358                                       | 4.87E-78             |
| dCas9-KRAB-MeCP2_day14** | -2.586                                       | 3.52E-80             |

<sup>#</sup> *p*-value is derived from one-tailed Welch T-test comparing the log<sub>2</sub> OR of the essential guides versus the log<sub>2</sub> OR of the non-essential guides. See **Supplementary Note 3** for detailed analysis and statistical test.

\* Log<sub>2</sub> Odds-ratio (log<sub>2</sub> OR) that was -Infinity, i.e. complete depletion, were replaced by the least finite OR for day 7, i.e. -7.607176

\*\* log<sub>2</sub> Odds-ratio (log<sub>2</sub> OR) that were -Infinity, i.e. complete depletion, were replaced by the least finite OR for day 14, i.e. -8.867043

**Supplementary Table 5** Mean fold changes of all essential gene-targeting sgRNAs and *p*-values for statistical comparison between essential and non-essential guides in SH-SY5Y lethality screen.

| Experiment             | mean essential guides<br>log <sub>2</sub> OR | P-value <sup>#</sup> |
|------------------------|----------------------------------------------|----------------------|
| dCas9_day0             | -0.0517                                      | 0.0009321            |
| dCas9_day7             | -0.10179                                     | 9.92E-16             |
| dCas9_day14            | -0.12011                                     | 3.76E-20             |
| dCas9_day22            | -0.149066                                    | 1.31E-23             |
| dCas9-KRAB_day0        | -0.1341297                                   | 3.79E-22             |
| dCas9-KRAB_day7        | -0.3476919                                   | 4.72E-37             |
| dCas9-KRAB_day14       | -0.3733395                                   | 2.16E-44             |
| dCas9-KRAB_day22       | -0.386887                                    | 2.24E-52             |
| dCas9-KRAB-MeCP2_day0  | -0.1937839                                   | 5.27E-26             |
| dCas9-KRAB-MeCP2_day7  | -0.4740388                                   | 2.55E-55             |
| dCas9-KRAB-MeCP2_day14 | -0.3774654                                   | 1.19E-63             |
| dCas9-KRAB-MeCP2_day22 | -0.525382                                    | 3.08E-70             |

<sup>#</sup> *p*-value is derived from one-tailed Welch T-test comparing the log<sub>2</sub> OR of the essential guides versus the log<sub>2</sub> OR of the non-essential guides. See **Supplementary Note 3** for detailed analysis and statistical test.

**Supplementary Table 6** Mean fold changes of all essential gene-targeting sgRNAs and *p*-values for statistical comparison between essential and non-essential guides in HEK293T lethality screen.

| Experiment             | mean essential guides<br>log <sub>2</sub> OR | P-value <sup>#</sup> |
|------------------------|----------------------------------------------|----------------------|
| dCas9_day0             | 0.003201572                                  | 0.12                 |
| dCas9_day7             | -0.03381157                                  | 1.18E-06             |
| dCas9_day14            | -0.05741197                                  | 2.43E-08             |
| dCas9-KRAB_day0        | -0.07741853                                  | 0.02                 |
| dCas9-KRAB _day7       | -0.06196394                                  | 1.53E-14             |
| dCas9-KRAB _day14      | -0.007220968                                 | 4.15E-15             |
| dCas9-KRAB-MeCP2_day0  | -0.03050618                                  | 2.34E-06             |
| dCas9-KRAB-MeCP2_day7  | -0.120637                                    | 7.67E-38             |
| dCas9-KRAB-MeCP2_day14 | -0.1226212                                   | 4.63E-34             |

<sup>#</sup> *p*-value is derived from one-tailed Welch T-test comparing the log<sub>2</sub> OR of the essential guides versus the log<sub>2</sub> OR of the non-essential guides. See **Supplementary Note 3** for detailed analysis and statistical test.

**Supplementary Table 7.** Shown is the total number of sgRNAs showing depletion within or outside of the optimal targeting window previously defined for repression. Data was based on our pooled essentiality screens where 370 essential gene-targeting sgRNAs were tested.

**a. Summary of depleted sgRNAs in HAP1 cells at day 14**

| Targeting window               | Total number of essential sgRNAs | Number of significantly depleted sgRNAs with dCas9 | Number of significantly depleted sgRNAs with dCas9-KRAB | Number of significantly depleted sgRNAs with dCas9-KRAB-MeCP2 |
|--------------------------------|----------------------------------|----------------------------------------------------|---------------------------------------------------------|---------------------------------------------------------------|
| Within -50 to +200bp from TSS  | 213                              | 35                                                 | 94                                                      | 181                                                           |
| Outside -50 to +200bp from TSS | 144                              | 19                                                 | 47                                                      | 113                                                           |

**b. Summary of depleted sgRNAs in SH-SY5Y cells at day 22**

| Targeting window               | Total number of essential sgRNAs | Number of significantly depleted sgRNAs with dCas9 | Number of significantly depleted sgRNAs with dCas9-KRAB | Number of significantly depleted sgRNAs with dCas9-KRAB-MeCP2 |
|--------------------------------|----------------------------------|----------------------------------------------------|---------------------------------------------------------|---------------------------------------------------------------|
| Within -50 to +200bp from TSS  | 213                              | 75                                                 | 117                                                     | 149                                                           |
| Outside -50 to +200bp from TSS | 144                              | 27                                                 | 58                                                      | 77                                                            |

c. Summary of depleted sgRNAs in 293T cells at day 14

| Targeting window               | Total number of essential sgRNAs | Number of significantly depleted sgRNAs with dCas9 | Number of significantly depleted sgRNAs with dCas9-KRAB | Number of significantly depleted sgRNAs with dCas9-KRAB-MeCP2 |
|--------------------------------|----------------------------------|----------------------------------------------------|---------------------------------------------------------|---------------------------------------------------------------|
| Within -50 to +200bp from TSS  | 213                              | 50                                                 | 64                                                      | 84                                                            |
| Outside -50 to +200bp from TSS | 144                              | 26                                                 | 29                                                      | 49                                                            |

**Supplementary Table 8** Sequence of oligos used to construct dual guide RNA library

| Target genes | Sequence of oligos used for cloning                                     | Note                  |
|--------------|-------------------------------------------------------------------------|-----------------------|
| BLM          | [TTTTCGTCTCTCACCG]<br>AGGAAACGGAAGAACCCGAG<br>[gtttagagctatgctgaaaagca] | first spacer BLM_1    |
| WRN          | [TTTTCGTCTCTCACCG]<br>CCGGCTTGTACTCGGCAGCG<br>[gtttagagctatgctgaaaagca] | first spacer WRN_1    |
| RECQL1       | [TTTTCGTCTCTCACCG]<br>GCTGAACGGACCGACCCGGA<br>[gtttagagctatgctgaaaagca] | first spacer RecQL1_1 |
| RECQL4       | [TTTTCGTCTCTCACCG]<br>TCGCTGGACGATCGCAAGCG<br>[gtttagagctatgctgaaaagca] | first spacer RecQL4_1 |
| RECQL5       | [TTTTCGTCTCTCACCG]<br>CGACGGATATAAGATTGCGT<br>[gtttagagctatgctgaaaagca] | first spacer RecQL5_1 |
| BLM          | [TTTTCGTCTCTCACCG]<br>CCTCGCACGCAGACTCCTAG<br>[gtttagagctatgctgaaaagca] | first spacer BLM_2    |
| WRN          | [TTTTCGTCTCTCACCG]<br>CTAGCACTATAGATACCCCG<br>[gtttagagctatgctgaaaagca] | first spacer WRN_2    |
| RECQL1       | [TTTTCGTCTCTCACCG]<br>GAGATCGGAGAGTCGGACAC<br>[gtttagagctatgctgaaaagca] | first spacer RecQL1_2 |
| RECQL4       | [TTTTCGTCTCTCACCG]<br>TGGAGCGGCTGCGGGACGTG<br>[gtttagagctatgctgaaaagca] | first spacer RecQL4_2 |
| RECQL5       | [TTTTCGTCTCTCACCG]<br>TGAGTTGGGGTTGTGTATAG<br>[gtttagagctatgctgaaaagca] | first spacer RecQL5_2 |
| BLM          | [TTTTCGTCTCTCACCG]<br>CCGCTAGGAGTCTGCGTGCG<br>[gtttagagctatgctgaaaagca] | first spacer BLM_3    |
| WRN          | [TTTTCGTCTCTCACCG]<br>GATGTGTACTGTGTGCGCCG<br>[gtttagagctatgctgaaaagca] | first spacer WRN_3    |
| RECQL1       | [TTTTCGTCTCTCACCG]<br>AAGATTTTACTCCCGAGTAG<br>[gtttagagctatgctgaaaagca] | first spacer RecQL1_3 |
| RECQL4       | [TTTTCGTCTCTCACCG]<br>CTGGACGATCGCAAGCGCGG<br>[gtttagagctatgctgaaaagca] | first spacer RecQL4_3 |
| RECQL5       | [TTTTCGTCTCTCACCG]<br>TTAATTCTTGGGCGGACCA<br>[gtttagagctatgctgaaaagca]  | first spacer RecQL5_3 |
| GFP          | [TTTTCGTCTCTCACCG]<br>CAAGTTCAGCGTGTCCGGCG<br>[gtttagagctatgctgaaaagca] | first spacer GFP_1    |
| LACZ         | [TTTTCGTCTCTCACCG]<br>AGGTAGCAGAGCGGGTAAAC                              | first spacer LACZ_1   |

|                           |                                                                           |                      |
|---------------------------|---------------------------------------------------------------------------|----------------------|
|                           | [gttttagagctatgctgaaaagca]                                                |                      |
| LUC                       | [TTTTCGTCTCTCACCG]<br>AACGCCTTGATTGACAAGGA<br>[gttttagagctatgctgaaaagca]  | first spacer LUC_1   |
| RPL34<br>(ESSENTIAL GENE) | [TTTTCGTCTCTCACCG]<br>TGGTGAGCTGTGGCTACTCA<br>[gttttagagctatgctgaaaagca]  | first spacer RPL34_1 |
| RPL11<br>(ESSENTIAL GENE) | [TTTTCGTCTCTCACCG]<br>TCTCTTCTGCTCTCCATCA<br>[gttttagagctatgctgaaaagca]   | first spacer RPL11_1 |
| RPS24<br>(ESSENTIAL GENE) | [TTTTCGTCTCTCACCG]<br>CCATCATGGTGAGTCTCCCT<br>[gttttagagctatgctgaaaagca]  | first spacer RPS24_1 |
| GFP                       | [TTTTCGTCTCTCACCG]<br>CAGCTCGATGCGGTTACCA<br>[gttttagagctatgctgaaaagca]   | first spacer GFP_2   |
| LACZ                      | [TTTTCGTCTCTCACCG]<br>TTTGTGGACGAAGTACCGAA<br>[gttttagagctatgctgaaaagca]  | first spacer LACZ_2  |
| LUC                       | [TTTTCGTCTCTCACCG]<br>ACAAC TTTACCGACCGCGCC<br>[gttttagagctatgctgaaaagca] | first spacer LUC_2   |
| RPL34<br>(ESSENTIAL GENE) | [TTTTCGTCTCTCACCG]<br>CTCCTCGGATGGCAGCCGAT<br>[gttttagagctatgctgaaaagca]  | first spacer RPL34_2 |
| RPL11<br>(ESSENTIAL GENE) | [TTTTCGTCTCTCACCG]<br>CCAGCTACTACCGCCATGA<br>[gttttagagctatgctgaaaagca]   | first spacer RPL11_2 |
| RPS24<br>(ESSENTIAL GENE) | [TTTTCGTCTCTCACCG]<br>TCCGTGCGGTTGATATGAT<br>[gttttagagctatgctgaaaagca]   | first spacer RPS24_2 |
| GFP                       | [TTTTCGTCTCTCACCG]<br>CATGCCGAGAGTGATCCCGG<br>[gttttagagctatgctgaaaagca]  | first spacer GFP_3   |
| LACZ                      | [TTTTCGTCTCTCACCG]<br>AGGGCGGCTTCGTCTGGGAC<br>[gttttagagctatgctgaaaagca]  | first spacer LACZ_3  |
| LUC                       | [TTTTCGTCTCTCACCG]<br>AGCTATTCTGATTACACCG<br>[gttttagagctatgctgaaaagca]   | first spacer LUC_3   |
| RPL34<br>(ESSENTIAL GENE) | [TTTTCGTCTCTCACCG]<br>GAATGCAGCAAAGTCCCGGG<br>[gttttagagctatgctgaaaagca]  | first spacer RPL34_3 |
| RPL11<br>(ESSENTIAL GENE) | [TTTTCGTCTCTCACCG]<br>CGGCCTGCCATGGATGGCGA<br>[gttttagagctatgctgaaaagca]  | first spacer RPL11_3 |
| RPS24<br>(ESSENTIAL GENE) | [TTTTCGTCTCTCACCG]<br>CCGCGTATCCGAGCCATCCG<br>[gttttagagctatgctgaaaagca]  | first spacer RPS24_3 |
| BLM                       | [TTTTCGTCTCTAAAC]<br>CTCGGGTTCTCCGTTTCCT[cggtgACCCAGGCGG<br>CGCACAAG]     | second spacer BLM_1  |
| WRN                       | [TTTTCGTCTCTAAAC]<br>CGCTGCCGAGTACAAGCCGG[cggtgACCCAGGCGG<br>CGCACAAG]    | second spacer WRN_1  |

|        |                                                                         |                           |
|--------|-------------------------------------------------------------------------|---------------------------|
| RECQL1 | [TTTTCGTCTCTAAAC]<br>TCCGGGTCGGTCCGTTCAGC[cggtgACCCAGGCG<br>GCGCACAAG]  | second spacer<br>RecQL1_1 |
| RECQL4 | [TTTTCGTCTCTAAAC]<br>CGCTTGCATCGTCCAGCGA[cggtgACCCAGGCG<br>GCGCACAAG]   | second spacer<br>RecQL4_1 |
| RECQL5 | [TTTTCGTCTCTAAAC]<br>ACGCAATCTTATATCCGTTCG[cggtgACCCAGGCGG<br>CGCACAAG] | second spacer<br>RecQL5_1 |
| CHEK1  | [TTTTCGTCTCTAAAC]<br>CCTGGTACCATTCTCCACC[cggtgACCCAGGCGG<br>GCGCACAAG]  | second spacer<br>CHEK1_1  |
| CHEK2  | [TTTTCGTCTCTAAAC]<br>CCTGGAGCCGCACACTCTCC[cggtgACCCAGGCG<br>GCGCACAAG]  | second spacer<br>CHEK2_1  |
| SLX4   | [TTTTCGTCTCTAAAC]<br>CCCGGGTGCCGACTCCAGC[cggtgACCCAGGCG<br>GCGCACAAG]   | second spacer SLX4_1      |
| DNA2   | [TTTTCGTCTCTAAAC]<br>CCGGTCCGCTGTCTTTTCT[cggtgACCCAGGCGG<br>GCGCACAAG]  | second spacer DNA2_1      |
| EME1   | [TTTTCGTCTCTAAAC]<br>CTATCAGGAGATCTACTTCC[cggtgACCCAGGCGG<br>GCGCACAAG] | second spacer EME1_1      |
| GEN1   | [TTTTCGTCTCTAAAC]<br>CTCGGCTTTCCCTTGCCGGC[cggtgACCCAGGCG<br>GCGCACAAG]  | second spacer GEN1_1      |
| RNF4   | [TTTTCGTCTCTAAAC]<br>ACTTCCGCTTCGGAGGCCTC[cggtgACCCAGGCG<br>GCGCACAAG]  | second spacer RNF4_1      |
| SLX1   | [TTTTCGTCTCTAAAC]<br>GTCGGCGAGCGGTACCATT[cggtgACCCAGGCG<br>GCGCACAAG]   | second spacer SLX1_1      |
| TOP3A  | [TTTTCGTCTCTAAAC]<br>CCTCAGCACCGAATCCAGTA[cggtgACCCAGGCG<br>GCGCACAAG]  | Second spacer<br>TOP3A_1  |
| TOP3B  | [TTTTCGTCTCTAAAC]<br>CTATTTCCGGGTCCAGCCGC[cggtgACCCAGGCG<br>GCGCACAAG]  | second spacer<br>TOP3B_1  |
| WDHD1  | [TTTTCGTCTCTAAAC]<br>CAGTGGCGGAGGCTCGGTCA[cggtgACCCAGGCG<br>GCGCACAAG]  | second spacer<br>WDHD1_1  |
| CHTF8  | [TTTTCGTCTCTAAAC]<br>CGCGGCAACGGGCGACAAC[cggtgACCCAGGCG<br>GCGCACAAG]   | second spacer<br>CHTF8_1  |
| SOD1   | [TTTTCGTCTCTAAAC]<br>CGTCTCCGCGACTACTTTAT[cggtgACCCAGGCGG<br>GCGCACAAG] | second spacer SOD1_1      |
| GFP    | [TTTTCGTCTCTAAAC]<br>CGCCGGACACGCTGAACTTG[cggtgACCCAGGCG<br>GCGCACAAG]  | second spacer GFP_1       |
| LACZ   | [TTTTCGTCTCTAAAC]<br>GTTTACCCGCTCTGCTACCT[cggtgACCCAGGCGG<br>GCGCACAAG] | second spacer LACZ_1      |

|                              |                                                                        |                           |
|------------------------------|------------------------------------------------------------------------|---------------------------|
| LUC                          | [TTTTCGTCTCTAAAC]<br>TCCTTGTCATCAAGGCGTT[cggtgACCCAGGCGG<br>GCGACAAG]  | second spacer LUC_1       |
| RPL34<br>(ESSENTIAL<br>GENE) | [TTTTCGTCTCTAAAC]<br>TGAGTAGCCACAGCTCACCA[cggtgACCCAGGCG<br>GCGACAAG]  | second spacer RPL34_1     |
| RPL11<br>(ESSENTIAL<br>GENE) | [TTTTCGTCTCTAAAC]<br>TGATGGAGAGCAGGAAGAGA[cggtgACCCAGGCG<br>GCGACAAG]  | second spacer RPL11_1     |
| RPS24<br>(ESSENTIAL<br>GENE) | [TTTTCGTCTCTAAAC]<br>AGGGAGACTCACCATGATGG[cggtgACCCAGGCG<br>GCGACAAG]  | second spacer<br>RPS24_1  |
| BLM                          | [TTTTCGTCTCTAAAC]<br>CTAGGAGTCTGCGTGCGAGG[cggtgACCCAGGCG<br>GCGACAAG]  | second spacer BLM_2       |
| WRN                          | [TTTTCGTCTCTAAAC]<br>CGGGGTATCTATAGTGCTAG[cggtgACCCAGGCG<br>GCGACAAG]  | second spacer WRN_2       |
| RECQL1                       | [TTTTCGTCTCTAAAC]<br>GTGTCCGACTCTCCGATCTC[cggtgACCCAGGCGG<br>GCGACAAG] | second spacer<br>RecQL1_2 |
| RECQL4                       | [TTTTCGTCTCTAAAC]<br>CACGTCCCAGCCGCTCCA[cggtgACCCAGGCG<br>GCGACAAG]    | second spacer<br>RecQL4_2 |
| RECQL5                       | [TTTTCGTCTCTAAAC]<br>CTATACACAACCCCAACTCA[cggtgACCCAGGCGG<br>GCGACAAG] | second spacer<br>RecQL5_2 |
| CHEK1                        | [TTTTCGTCTCTAAAC]<br>TCCCTCACTAATCTAGACCC[cggtgACCCAGGCGG<br>GCGACAAG] | second spacer<br>CHEK1_2  |
| CHEK2                        | [TTTTCGTCTCTAAAC]<br>CTCTGCTGGCTGAGGCTGCG[cggtgACCCAGGCG<br>GCGACAAG]  | second spacer<br>CHEK2_2  |
| SLX4                         | [TTTTCGTCTCTAAAC]<br>CGGAGCCAGCGAGGGAGACG[cggtgACCCAGGC<br>GGCGACAAG]  | second spacer SLX4_2      |
| DNA2                         | [TTTTCGTCTCTAAAC]<br>CTCCGCTCACAGCTCCGCCG[cggtgACCCAGGCG<br>GCGACAAG]  | second spacer DNA2_2      |
| EME1                         | [TTTTCGTCTCTAAAC]<br>CCTGAACACCGCTCTGCAGA[cggtgACCCAGGCG<br>GCGACAAG]  | second spacer EME1_2      |
| GEN1                         | [TTTTCGTCTCTAAAC]<br>CCCGTGCTACCAGCTTCCC[cggtgACCCAGGCG<br>GCGACAAG]   | second spacer GEN1_2      |
| RNF4                         | [TTTTCGTCTCTAAAC]<br>CGAGAAAGATGCCGCCGCCT[cggtgACCCAGGCG<br>GCGACAAG]  | second spacer RNF4_2      |
| SLX1                         | [TTTTCGTCTCTAAAC]<br>CGGTACCGGGGCCGCTCTA[cggtgACCCAGGCG<br>GCGACAAG]   | second spacer SLX1_2      |
| TOP3A                        | [TTTTCGTCTCTAAAC]<br>CGCTTCGGTCACGTCCCAC[cggtgACCCAGGCG<br>GCGACAAG]   | second spacer<br>TOP3A_2  |

|                              |                                                                        |                           |
|------------------------------|------------------------------------------------------------------------|---------------------------|
| TOP3B                        | [TTTTCGTCTCTAAAC]<br>GAGCTGGATCCGCGGTGCGG[cggtgACCCAGGCG<br>GCGACAAG]  | second spacer<br>TOP3B_2  |
| WDHD1                        | [TTTTCGTCTCTAAAC]<br>CTAGGGCCGTTCTCCGCAG[cggtgACCCAGGCG<br>GCGACAAG]   | second spacer<br>WDHD1_2  |
| CHTF8                        | [TTTTCGTCTCTAAAC]<br>CTCGGCTCGCCATTCTTCTC[cggtgACCCAGGCGG<br>CGCACAAG] | second spacer<br>CHTF8_2  |
| SOD1                         | [TTTTCGTCTCTAAAC]<br>TCGTGCCATAACTCGCTAG[cggtgACCCAGGCGG<br>CGCACAAG]  | second spacer SOD1_2      |
| GFP                          | [TTTTCGTCTCTAAAC]<br>TGGTGAACCGCATCGAGCTG[cggtgACCCAGGCG<br>GCGACAAG]  | second spacer GFP_2       |
| LACZ                         | [TTTTCGTCTCTAAAC]<br>TTCGGTACTTCGTCCACAAA[cggtgACCCAGGCGG<br>CGCACAAG] | second spacer LACZ_2      |
| LUC                          | [TTTTCGTCTCTAAAC]<br>GGCGCGGTCCGTAAAGTTGT[cggtgACCCAGGCG<br>GCGACAAG]  | second spacer LUC_2       |
| RPL34<br>(ESSENTIAL<br>GENE) | [TTTTCGTCTCTAAAC]<br>ATCGGCTGCCATCCGAGGAG[cggtgACCCAGGCG<br>GCGACAAG]  | second spacer RPL34_2     |
| RPL11<br>(ESSENTIAL<br>GENE) | [TTTTCGTCTCTAAAC]<br>TCATGGCGGTGAGTAGCTGG[cggtgACCCAGGCG<br>GCGACAAG]  | second spacer RPL11_2     |
| RPS24<br>(ESSENTIAL<br>GENE) | [TTTTCGTCTCTAAAC]<br>ATCATATCAACGCGCACGGA[cggtgACCCAGGCG<br>GCGACAAG]  | second spacer<br>RPS24_2  |
| BLM                          | [TTTTCGTCTCTAAAC]<br>CGCACGCAGACTCCTAGCGG[cggtgACCCAGGCG<br>GCGACAAG]  | second spacer BLM_3       |
| WRN                          | [TTTTCGTCTCTAAAC]<br>CGGCGCACACAGTACACATC[cggtgACCCAGGCG<br>GCGACAAG]  | second spacer WRN_3       |
| RECQL1                       | [TTTTCGTCTCTAAAC]<br>CTACTCGGGAGTAAAATCTT[cggtgACCCAGGCGG<br>CGCACAAG] | second spacer<br>RecQL1_3 |
| RECQL4                       | [TTTTCGTCTCTAAAC]<br>CCGCGCTTGCGATCGTCCAG[cggtgACCCAGGCG<br>GCGACAAG]  | second spacer<br>RecQL4_3 |
| RECQL5                       | [TTTTCGTCTCTAAAC]<br>TGGTCCGCCAAGAATTTAA[cggtgACCCAGGCGG<br>CGCACAAG]  | second spacer<br>RecQL5_3 |
| CHEK1                        | [TTTTCGTCTCTAAAC]<br>CTCTGAATGTCGGCGGCTCC[cggtgACCCAGGCG<br>GCGACAAG]  | second spacer<br>CHEK1_3  |
| CHEK2                        | [TTTTCGTCTCTAAAC]<br>CATATGACTCACCGCGTGAG[cggtgACCCAGGCG<br>GCGACAAG]  | second spacer<br>CHEK2_3  |
| SLX4                         | [TTTTCGTCTCTAAAC]<br>CCGCGGAGCATTGCCTGCGC[cggtgACCCAGGCG<br>GCGACAAG]  | second spacer SLX4_3      |

|                              |                                                                         |                          |
|------------------------------|-------------------------------------------------------------------------|--------------------------|
| DNA2                         | [TTTTCGTCTCTAAAC]<br>CGCGTCCAGGATGGAGCAGC[cggtgACCCAGGCG<br>GCGCACAAG]  | second spacer DNA2_3     |
| EME1                         | [TTTTCGTCTCTAAAC]<br>CAGGCCTGCGACCGGGGACG[cggtgACCCAGGCG<br>GCGCACAAG]  | second spacer EME1_3     |
| GEN1                         | [TTTTCGTCTCTAAAC]<br>CCGAGTCCGGTCACTGCGGA[cggtgACCCAGGCG<br>GCGCACAAG]  | second spacer GEN1_3     |
| RNF4                         | [TTTTCGTCTCTAAAC]<br>CGCAGCGCGGCTCCCCAAG[cggtgACCCAGGCG<br>GCGCACAAG]   | second spacer RNF4_3     |
| SLX1                         | [TTTTCGTCTCTAAAC]<br>TACTAAGGCGTACGTCAACG[cggtgACCCAGGCG<br>GCGCACAAG]  | second spacer SLX1_3     |
| TOP3A                        | [TTTTCGTCTCTAAAC]<br>CACAGCGACCTGGA ACTACA[cggtgACCCAGGCG<br>GCGCACAAG] | second spacer<br>TOP3A_3 |
| TOP3B                        | [TTTTCGTCTCTAAAC]<br>CCCCGGGAACAAGACCGGA[cggtgACCCAGGCG<br>GCGCACAAG]   | second spacer<br>TOP3B_3 |
| WDHD1                        | [TTTTCGTCTCTAAAC]<br>GAGTGGGACTCACCCGGGT[cggtgACCCAGGCG<br>GCGCACAAG]   | second spacer<br>WDHD1_3 |
| CHTF8                        | [TTTTCGTCTCTAAAC]<br>CCAATCCCGGCTCGGCCCTC[cggtgACCCAGGCG<br>GCGCACAAG]  | second spacer<br>CHTF8_3 |
| SOD1                         | [TTTTCGTCTCTAAAC]<br>TTCAGCACGCACACGGCCTT[cggtgACCCAGGCG<br>GCGCACAAG]  | second spacer SOD1_3     |
| GFP                          | [TTTTCGTCTCTAAAC]<br>CCGGGATCACTCTCGGCATG[cggtgACCCAGGCG<br>GCGCACAAG]  | second spacer GFP_3      |
| LACZ                         | [TTTTCGTCTCTAAAC]<br>GTCCCAGACGAAGCCGCCCT[cggtgACCCAGGCG<br>GCGCACAAG]  | second spacer LACZ_3     |
| LUC                          | [TTTTCGTCTCTAAAC]<br>CGGGTGTAATCAGAATAGCT[cggtgACCCAGGCGG<br>CGCACAAG]  | second spacer LUC_3      |
| RPL34<br>(ESSENTIAL<br>GENE) | [TTTTCGTCTCTAAAC]<br>CCCGGACTTTGCTGCATTC[cggtgACCCAGGCG<br>GCGCACAAG]   | second spacer RPL34_3    |
| RPL11<br>(ESSENTIAL<br>GENE) | [TTTTCGTCTCTAAAC]<br>TCGCCATCCATGGCAGGCCG[cggtgACCCAGGCG<br>GCGCACAAG]  | second spacer RPL11_3    |
| RPS24<br>(ESSENTIAL<br>GENE) | [TTTTCGTCTCTAAAC]<br>CGGATGGCTCGGATACGGG[cggtgACCCAGGCG<br>GCGCACAAG]   | second spacer<br>RPS24_3 |
| TOP1                         | [TTTTCGTCTCTAAAC]<br>AAGTTCGCATTTGGGCTCAC[cggtgACCCAGGCGG<br>CGCACAAG]  | second spacer TOP1_1     |
| FEN1                         | [TTTTCGTCTCTAAAC]<br>CCGGGAGCGACGGGGTCCGC[cggtgACCCAGGC<br>GGCGCACAAG]  | second spacer FEN1_1     |

|          |                                                                        |                             |
|----------|------------------------------------------------------------------------|-----------------------------|
| EXO1     | [TTTTCGTCTCTAAAC]<br>TTCGCGCTGTGTAGGCAA[cggtgACCCAGGCG<br>GCGACAAG]    | second spacer EXO1_1        |
| RNASEH1  | [TTTTCGTCTCTAAAC]<br>CGCCGGTGACGGAAGTGCGG[cggtgACCCAGGCG<br>GCGACAAG]  | second spacer<br>RNASEH1_1  |
| LIG4     | [TTTTCGTCTCTAAAC]<br>CCGGTCTGTTGCCCCACAGA[cggtgACCCAGGCG<br>GCGACAAG]  | second spacer LIG4_1        |
| BRCA1    | [TTTTCGTCTCTAAAC]<br>TCTGTCAGCTTCGAAATCC[cggtgACCCAGGCGG<br>CGCACAAG]  | second spacer<br>BRCA1_1    |
| MRE11    | [TTTTCGTCTCTAAAC]<br>CGGGAGAGAACGGCGTCCGT[cggtgACCCAGGCG<br>GCGACAAG]  | second spacer<br>MRE11_1    |
| CTIP     | [TTTTCGTCTCTAAAC]<br>CCGAGATTGCCTCGGGATTC[cggtgACCCAGGCG<br>GCGACAAG]  | second spacer CTIP_1        |
| RNASEH2A | [TTTTCGTCTCTAAAC]<br>CATCGACGCCAGGACGCAA[cggtgACCCAGGCG<br>GCGACAAG]   | second spacer<br>RNASEH2A_1 |
| RAD51B   | [TTTTCGTCTCTAAAC]<br>CCTTAAGACTCGGGATCGTC[cggtgACCCAGGCG<br>GCGACAAG]  | second spacer<br>RAD51B_1   |
| XRCC3    | [TTTTCGTCTCTAAAC]<br>CCCGCGGTTCCGCACTCCT[cggtgACCCAGGCG<br>GCGACAAG]   | second spacer<br>XRCC3_1    |
| RAD51C   | [TTTTCGTCTCTAAAC]<br>CCGAGCTTAGCAAAGGTAAC[cggtgACCCAGGCG<br>GCGACAAG]  | second spacer<br>RAD51C_1   |
| BRCA2    | [TTTTCGTCTCTAAAC]<br>CCTAGTTTCAGAAGCTCGCG[cggtgACCCAGGCG<br>GCGACAAG]  | second spacer<br>BRCA2_1    |
| RAD52    | [TTTTCGTCTCTAAAC]<br>TCTTGTTACTCCCTAGCAGT[cggtgACCCAGGCGG<br>CGCACAAG] | second spacer<br>RAD52_1    |
| RTEL     | [TTTTCGTCTCTAAAC]<br>CGGCGAACCTTCCAGAACCG[cggtgACCCAGGCG<br>GCGACAAG]  | second spacer Rtel_1        |
| FBH1     | [TTTTCGTCTCTAAAC]<br>CGTCTGCGCCTCACGCACT[cggtgACCCAGGCG<br>GCGACAAG]   | second spacer Fbh1_1        |
| FANCM    | [TTTTCGTCTCTAAAC]<br>CTACGGTTCGATCCCATC[cggtgACCCAGGCGG<br>CGCACAAG]   | second spacer<br>FANCM_1    |
| TOP1     | [TTTTCGTCTCTAAAC]<br>CCGCTTACCTGCGCCTCCTC[cggtgACCCAGGCG<br>GCGACAAG]  | second spacer TOP1_2        |
| FEN1     | [TTTTCGTCTCTAAAC]<br>CCCGCCGTAAGCTGAGAAG[cggtgACCCAGGCG<br>GCGACAAG]   | second spacer FEN1_2        |
| EXO1     | [TTTTCGTCTCTAAAC]<br>GTGTTCTGCGTTGCCGGCCG[cggtgACCCAGGCG<br>GCGACAAG]  | second spacer EXO1_2        |

|          |                                                                        |                             |
|----------|------------------------------------------------------------------------|-----------------------------|
| RNASEH1  | [TTTTCGTCTCTAAAC]<br>CCGGCGCTCAACACCGCACT[cggtgACCCAGGCG<br>GCGACAAG]  | second spacer<br>RNASEH1_2  |
| LIG4     | [TTTTCGTCTCTAAAC]<br>GCGTGCTTGAGCCCGGTGAC[cggtgACCCAGGCG<br>GCGACAAG]  | second spacer LIG4_2        |
| BRCA1    | [TTTTCGTCTCTAAAC]<br>TCCAGGAAGTCTCAGCGAGC[cggtgACCCAGGCG<br>GCGACAAG]  | second spacer<br>BRCA1_2    |
| MRE11    | [TTTTCGTCTCTAAAC]<br>TGGGTGCGGATTGTGGGGCT[cggtgACCCAGGCG<br>GCGACAAG]  | second spacer<br>MRE11_2    |
| CTIP     | [TTTTCGTCTCTAAAC]<br>CCGAGTGTAGCCCGGGCCCG[cggtgACCCAGGCG<br>GCGACAAG]  | second spacer CTIP_2        |
| RNASEH2A | [TTTTCGTCTCTAAAC]<br>CGGGCACAGGCGAACTCAGG[cggtgACCCAGGCG<br>GCGACAAG]  | second spacer<br>RNASEH2A_2 |
| RAD51B   | [TTTTCGTCTCTAAAC]<br>CCAATATCGAAACCCACGAG[cggtgACCCAGGCG<br>GCGACAAG]  | second spacer<br>RAD51B_2   |
| XRCC3    | [TTTTCGTCTCTAAAC]<br>CGGGTCCGCACTCCTTTC[cggtgACCCAGGCG<br>GCGACAAG]    | second spacer<br>XRCC3_2    |
| RAD51C   | [TTTTCGTCTCTAAAC]<br>CGCTGGGGCGTGCGGCGTGA[cggtgACCCAGGCG<br>GCGACAAG]  | second spacer<br>RAD51C_2   |
| BRCA2    | [TTTTCGTCTCTAAAC]<br>CGGGTGTCTTTTGC GGCGGT[cggtgACCCAGGCG<br>GCGACAAG] | second spacer<br>BRCA2_2    |
| RAD52    | [TTTTCGTCTCTAAAC]<br>TTCATTTCTTGACATCCGG[cggtgACCCAGGCGG<br>CGACAAG]   | second spacer<br>RAD52_2    |
| RTEL     | [TTTTCGTCTCTAAAC]<br>TTGCTTTGTGCTCCCGGCGG[cggtgACCCAGGCG<br>GCGACAAG]  | second spacer Rtel_2        |
| FBH1     | [TTTTCGTCTCTAAAC]<br>CCGTGTGGAAACTTAACCT[cggtgACCCAGGCGG<br>CGACAAG]   | second spacer Fbh1_2        |
| FANCM    | [TTTTCGTCTCTAAAC]<br>TCGGTGGTTGTCGGCCTAAT[cggtgACCCAGGCG<br>GCGACAAG]  | second spacer<br>FANCM_2    |
| TOP1     | [TTTTCGTCTCTAAAC]<br>CACAGGCCGTTTCGCGTCT[cggtgACCCAGGCG<br>GCGACAAG]   | second spacer TOP1_3        |
| FEN1     | [TTTTCGTCTCTAAAC]<br>CGAACCAAGCTTTAGCCGCC[cggtgACCCAGGCG<br>GCGACAAG]  | second spacer FEN1_3        |
| EXO1     | [TTTTCGTCTCTAAAC]<br>CTGGGCGGGGCCGCAAGGAA[cggtgACCCAGGCG<br>GCGACAAG]  | second spacer EXO1_3        |
| RNASEH1  | [TTTTCGTCTCTAAAC]<br>ACAGAGTCGCCTTGGCCGCC[cggtgACCCAGGCG<br>GCGACAAG]  | second spacer<br>RNASEH1_3  |

|          |                                                                        |                             |
|----------|------------------------------------------------------------------------|-----------------------------|
| LIG4     | [TTTTCGTCTCTAAAC]<br>CACAGACTTCTCGCCGCCTG[cggtgACCCAGGCG<br>GCGACAAG]  | second spacer LIG4_3        |
| BRCA1    | [TTTTCGTCTCTAAAC]<br>CCCGTCAAAGAATACCCATC[cggtgACCCAGGCGG<br>CGCACAAG] | second spacer<br>BRCA1_3    |
| MRE11    | [TTTTCGTCTCTAAAC]<br>CGGAATTCAGGTTTACGGCC[cggtgACCCAGGCG<br>GCGACAAG]  | second spacer<br>MRE11_3    |
| CTIP     | [TTTTCGTCTCTAAAC]<br>CGGTGGGAAAGCCGACCCCT[cggtgACCCAGGCG<br>GCGACAAG]  | second spacer CTIP_3        |
| RNASEH2A | [TTTTCGTCTCTAAAC]<br>AGACCCGCTCCTGCAGTATT[cggtgACCCAGGCGG<br>CGCACAAG] | second spacer<br>RNASEH2A_3 |
| RAD51B   | [TTTTCGTCTCTAAAC]<br>CACAACGGCACCCACATGA[cggtgACCCAGGCG<br>GCGACAAG]   | second spacer<br>RAD51B_3   |
| XRCC3    | [TTTTCGTCTCTAAAC]<br>CGGGTCTCCATTGCCGAGC[cggtgACCCAGGCG<br>GCGACAAG]   | second spacer<br>XRCC3_3    |
| RAD51C   | [TTTTCGTCTCTAAAC]<br>CTGCATTTCAAAGCGGAACG[cggtgACCCAGGCG<br>GCGACAAG]  | second spacer<br>RAD51C_3   |
| BRCA2    | [TTTTCGTCTCTAAAC]<br>CGCCGGTCACAAATCTGTCC[cggtgACCCAGGCG<br>GCGACAAG]  | second spacer<br>BRCA2_3    |
| RAD52    | [TTTTCGTCTCTAAAC]<br>CCGGGGTGGTTCTAGCCGTG[cggtgACCCAGGCG<br>GCGACAAG]  | second spacer<br>RAD52_3    |
| RTEL     | [TTTTCGTCTCTAAAC]<br>TCGACTGGAGTCGGTTGAGT[cggtgACCCAGGCG<br>GCGACAAG]  | second spacer Rtel_3        |
| FBH1     | [TTTTCGTCTCTAAAC]<br>CAGTGCGTGAGGCCGCAGAC[cggtgACCCAGGCG<br>GCGACAAG]  | second spacer Fbh1_3        |
| FANCM    | [TTTTCGTCTCTAAAC]<br>CACGTCTGAAAAAGCGTTCT[cggtgACCCAGGCGG<br>CGCACAAG] | second spacer<br>FANCM_3    |

Note: Sequences in bracket '[' ] are homologous to guide expression vector. First spacer represents oligo sequence cloned into the first guide position, while second spacer represents oligo sequence cloned into the second guide position in the vector.

**Supplementary Table 9** Sequence of sgRNAs used in the studies

| Target gene                  | sgRNA sequence         |
|------------------------------|------------------------|
| EYFP reporter <sup>1</sup>   | TACCTCATCAGGAACATGT    |
| NEAT1 sgRNA1                 | GCGACAGGGAGGGATGCGCGCC |
| NEAT1 sgRNA2                 | GCGCGCCTGGGTGTAGTTGT   |
| NEAT1 sgRNA3                 | GAAGTGGCTAGCTCAGGGCTTC |
| CXCR4                        | CAGGTAGCAAAGTGACGCCGA  |
| SEL1L sgRNA1                 | GCAGGAAGAGCAGCGGCGAGG  |
| SEL1L sgRNA2                 | GGGGCGGATACTGACCCG     |
| SEL1L sgRNA3 <sup>2</sup>    | GATACTGACCCGAGGACGCCG  |
| ARPC2 sgRNA1 <sup>2</sup>    | TGTCGGTGAAGCGGCAGTGG   |
| ARPC2 sgRNA2                 | CAGGCGGGTTCAGGCTTCGG   |
| ERK1 sgRNA1 <sup>2</sup>     | GGGAGCCCCGTAGAACCGAG   |
| ERK1 sgRNA2                  | CACCGCCCTCCTCCCCACGG   |
| BRCA1 sgRNA1                 | GGATTTCCGAAGCTGACAGA   |
| BRCA1 sgRNA2 <sup>2</sup>    | GCTCGCTGAGACTTCCTGGA   |
| BLM sgRNA1                   | AGGAAACGGAAGAACCCGAG   |
| BLM sgRNA2                   | CCTCGCACGCAGACTCCTAG   |
| MET1 sgRNA1                  | TGAGCAGATGCGGAGCCGAG   |
| MET1 sgRNA2                  | ACTGGTTCCTGGGCACCGAA   |
| RHOA sgRNA1                  | AGTTCCCGTGATGCCCCACG   |
| RHOA sgRNA2                  | GCGCGCCTCCGAGTGCCCG    |
| CHK2 sgRNA1                  | GGAGAGTGTGCGGCTCCAGG   |
| CHK2 sgRNA2                  | CGCAGCCTCAGCCAGCAGAG   |
| CHK1 sgRNA1                  | GGTGGAGGAATGGTACCAGG   |
| CHK1 sgRNA2 <sup>2</sup>     | GGGTCTAGATTAGTGAGGGA   |
| CANX_-700*                   | TGAAGTGAGATTAGGTGTCA   |
| CANX_-335*                   | GTTGGGTTGGAACGCCCCGA   |
| CANX_-505*                   | GGTTCTGCTCACGCCCGTAG   |
| CANX_-22*                    | GCTCGCTCGCGCGGCAGCGG   |
| CANX_-1 <sup>2</sup> *       | GGCCGAGGCCTCTTGTTCTG   |
| CANX_47*                     | GCGCCGCAGTAAAGAGAGAGG  |
| CANX_155*                    | TCGGGCCTGTGAGGACCTCG   |
| CANX_263*                    | CGACGCGCCCGCCGTGAGCG   |
| CANX_472*                    | GAGTAACTGGGTAAAAGTAT   |
| CANX_642*                    | ACCAGAAGGAGAACACGCAG   |
| SYVN1_-1032 <sup>3,4*</sup>  | GGAAAACGCAAGGCACAAAG   |
| SYVN1_-734 <sup>3,4*</sup>   | AACGTTCCCGGAGGCCAGCC   |
| SYVN1_-601 <sup>3,4*</sup>   | ACCTTTGCTGGCCTATAGAA   |
| SYVN1_-555 <sup>3,4,6*</sup> | AACTTATCGCAACCAATCAG   |
| SYVN1_-339 <sup>3,4,6*</sup> | CAGGTGGTACAGCCCGCAAG   |

|                               |                      |
|-------------------------------|----------------------|
| SYVN1_-194 <sup>3,4*</sup>    | ATTACCTTCGACCACCTCT  |
| SYVN1_-116 <sup>3,4,6*</sup>  | CCTACGTGGGCCCATAGCAA |
| SYVN1_-43 <sup>3,4*</sup>     | ACACCTCACTTCCGGCGGCG |
| SYVN1_19 <sup>3,5*</sup>      | CCGCTCAATCCGCGCGACTG |
| SYVN1_45 <sup>3,5*</sup>      | GGCGCTGGGTTCTGGTGAGT |
| SYVN1_183 <sup>3,5*</sup>     | GCACCGGCGTCTGAGGTCTC |
| SYVN1_228 <sup>2,3,5,6*</sup> | GTTGCGGGCGTCGCAGGCA  |
| SYVN1_292 <sup>3,5*</sup>     | GAGAGCAGCAGCGGGACGGG |
| SYVN1_480 <sup>3,5*</sup>     | TGAGAGCAGCCAAGGCACAG |
| SYVN1_702 <sup>3,5*</sup>     | TAAGTGATCACACTGACGCA |
| SYVN1_844 <sup>3,5*</sup>     | TCGTGCTGTGCAAAATAGCC |

1: Guide RNA targeting EYFP reporter in the reporter screen assay

2: Guide RNA used in single gene targeting experiments

3: Guide RNA used in 'mixed gRNAs 1-16' group shown in Figure 2b and Supplementary Figure 8

4: Guide RNA used in 'mixed gRNAs 1-8' group shown in Figure 2b and Supplementary Figure 8

5: Guide RNA used in 'mixed gRNAs 8-16' group shown in Figure 2b and Supplementary Figure 8

6: Guide RNA used in 'mixed best 4 gRNAs' group shown in Figure 2b and Supplementary Figure 8

\*: The numerical number indicates the position of spacer relative to transcription start site of the target gene.

**Supplementary Table 10** Sequences of all qPCR primers in the studies.

| Target gene | Forward qPCR primer sequence | Reverse qPCR primer sequence |
|-------------|------------------------------|------------------------------|
| NEAT1       | GTGGCTGTTGGAGTCGGTAT         | ATTCACTCCCCACCCTCTCT         |
| CXCR4       | ACTACACCGAGGAAATGGGCT        | CCCACAATGCCAGTTAAGAAGA       |
| SEL1L       | GAGGGGGAAAGTGTCACAGA         | GGTCAAAGCTGGTTTCCGTA         |
| SYVN        | ACCAGCATCCCTAGCTCAGA         | TCCTCAGGCATCTCCTCTGT         |
| ARPC2       | CTGGAGGTGAACAACCGCAT         | GACCCCATCGAAATCTGCAAA        |
| ERK1        | ATGTCATCGGCATCCGAGAC         | GGATCTGGTAGAGGAAGTAGCA       |
| BRCA1       | CTCAAGGAACCAGGGATGAA         | GCTGTAATGAGCTGGCATGA         |
| BLM         | CAGACTCCGAAGGAAGTTGTAT<br>G  | TTTGGGGTGGTGTAAACAATGA<br>T  |
| MET1        | AGCAATGGGGAGTGTAAGAGG        | CCCAGTCTTGTACTCAGCAAC        |
| RHOA        | GGAAAGCAGGTAGAGTTGGCT        | GGCTGTCGATGGAAAAACACAT       |
| CHK1        | ATATGAAGCGTGCCGTAGACT        | TGCCTATGTCTGGCTCTATTCTG      |
| CHK2        | GCGCCTGAAGTTCTTGTTTC         | CGTAAAACGTGCCTTTGGAT         |
| CANX        | GATCCAGACGCAGAGAAACC         | CATCCAGGAGCTGACTCACA         |
| TERC        | CCCTAACTGAGAAGGGCGTA         | GCTCTAGAATGAACGGTGGAA        |
| XIST        | AGGTCAGGCAGAGGAAGTCA         | CTGCCTCCCGATACAACAAT         |
| ACTB        | CATGTACGTTGCTATCCAGGC        | CTCCTTAATGTCACGCACGAT        |
| CAS9        | GAGTTGACGCCAAAGCAATC         | TACCAAACAGGCCGTTCTTC         |

**Supplementary Table 11** Sequence of sgRNA2-7SK template

sgRNA1 tail; 7SK promoter

```
gttttagagctatgctgaaaagcatagcaagtaaaataaggcagtgattttaatccagtcctacacaactgaaaaagtgcgcaccg  
attcgggtgcttttttCCTACGCACCTCGTCGAACCCTCACTGCAGTATTTAGCATGCCCCACCCATCT  
GCAAGGCATTCTGGATAGTGTCAAACAGCCGGAAATCAAGTCCGTTTATCTCAAACCTTAG  
CATTTGGGAATAAATGATATTTGCTATGCTGGTTAAATTAGATTTTAGTTAAATTCCTGCTG  
AAGCTCTAGTACGATAAGTAACTTGACCTAAGTGAAAGTTGAGATTCCTTCAGGTTTATAT  
AGCTTGTGCGCCGCCTGGGTcaccg
```

**Supplementary Table 12** Sequence of PCR primers for next generation sequencing

| PCR 1 primers                        | Sequence                                                           |
|--------------------------------------|--------------------------------------------------------------------|
| Forward primer<br>(lethality screen) | <b>CTTCCCTACACGACGCTCTTCCGATCT</b><br>NNNNNNCCCTTGGAGAAAAGCCTTGTTT |
| Reverse primer<br>(lethality screen) | <b>GGAGTTCAGACGTGTGCTCTTCCGATCT</b> TTGTACA<br>AGAAAGCTGGGTCTAG    |
| Forward primer<br>(epistasis screen) | <b>CTTCCCTACACGACGCTCTTCCGATCT</b><br>NNNNNNCTTGTGGAAAGGACGAAACACC |
| Reverse primer<br>(epistasis screen) | <b>GGAGTTCAGACGTGTGCTCTTCCGATCT</b> CATTTG<br>TCTCGAGGTCGAGAATTC   |

Sequences in bold are adaptor sequence for next generation sequencing.

**Supplementary Table 13** PCR cycling conditions to amplify libraries for next generation sequencing

PCR 1

| Step                                       | Temperature | Duration                                 |
|--------------------------------------------|-------------|------------------------------------------|
| Step 1                                     | 95 °C       | 8 min                                    |
| Step 2                                     | 95 °C       | 30 sec                                   |
| Step 3                                     | 60 °C       | 30 sec                                   |
| Step 4                                     | 72 °C       | 30 sec <sup>#</sup> / 1 min <sup>*</sup> |
| Repeat step 2-4 for a total a 25-30 cycles |             |                                          |
| Step 5                                     | 72 °C       | 2 min                                    |

# extension time for lethality screen library; \* extension time for epistasis screen library

PCR 2

| Step                                      | Temperature | Duration |
|-------------------------------------------|-------------|----------|
| Step 1                                    | 95          | 3 min    |
| Step 2                                    | 95          | 10 sec   |
| Step 3                                    | 55          | 20 sec   |
| Step 4                                    | 72          | 30 sec   |
| Repeat step 2-4 for a total a 5-10 cycles |             |          |

**Supplementary Note 1** Interpretation of pi scores. A positive pi-score suggests that the fitness effect of the gene pair knockdown is less than expected from individual knockdowns (e.g., loss of two proteins in a pathway or complex), while a negative pi-score means that the fitness effect was more pronounced than expected based on the individual fitness effects from single-gene knockdowns (e.g., synthetic lethal effects).

**Supplementary Note 2** This section describes the strategy used to identify and analyze genes with differential expression (DE) in our RNA-seq experiments. Related results are **Supplementary Figure 10-11** and **Supplementary Table 2**.

To analyze raw reads from RNA-sequencing experiments and profile whole transcriptome activity induced by dCas9, dCas9-KRAB and dCAS9-KRAB-MeCP2 repressors, we implemented edgeR quasi-likelihood (edgeR-quasi) pipeline for DE. EdgeR-quasi uses negative binomial generalized linear model<sup>1</sup> with F-tests<sup>2</sup>, and holds advantages over other methods as it provides speed and reliable error rate control. For the DE analyses, we utilize edgeR-quasi and limma-voom pipelines for two independent biological replicates of dCas9, dCas9-KRAB and dCAS9-KRAB-MeCP2 repressors. The sample size of n=2 in each repressor group is reasonable due to the low biological variability characteristic of cell culture experiments. Our analysis involves importing of raw counts, filtering of lowly expressed counts, normalization due to library size bias, DE, and clustering testing.

First, we tested DE between each repressor group relative to a control group (delivered sgRNA only) using the edgeR QL functions set to *robust=TRUE* in *glmQLFit* to reduce the number of false positives from genes with extreme dispersions (very low and very high). In **Supplementary Figure 10a-c**, we plot these results on two axes -  $\log_2$  fold change (FC) versus averaged  $\log_2$  counts per million (CPM), where positive  $\log_2$  FC indicates upregulated genes while negative  $\log_2$  FC represent downregulated genes relative to the negative control. DE genes at FDR of 5% and corrected using Benjamini-Hochberg method are shown in grey, whereas genes with no significant fold change are shown in black. *glmQLFTest* function identifies all DE only based on statistical significance including genes with small fold changes. To remove such bias, we apply the TREAT method<sup>3</sup> which leverages a negative binomial framework using the edgeR's *glmTreat* function, and simultaneously tests for significance and differential fold change at a cutoff of  $\log_2$  FC > 1.5. This method is more stringent as it requires larger p-values for calling genes and leads to fewer detected genes. It therefore provides better specificity in recognizing genes with true biological function. The resulting genes are plotted in red on **Supplementary Figure 10a-c** and summarized in the table on **Supplementary Figure 10d**. The identity of these genes are listed in **Supplementary Table 2**. The application of log fold change cutoff of 1.5 results in no downregulated genes, and significantly reduces the number of upregulated genes.

We display expression patterns of transcriptional changes by plotting the top 35 genes with DE in the control, dCas9, dCas9-KRAB and dCas9-KRAB-MeCP2 groups. Clustering of genes with correlated expression provides insights into the biological effects of repressor's activity. To display relative changes in genes across the four groups, we performed scaling such that each gene has a mean of zero and standard deviation of 1. The displayed gene clusters are based on Euclidean distance,  $(1-R)^2/2$  between each gene pair where R is the Pearson's correlation of the two genes. A scale bar key of normalized Log<sub>2</sub> CPM represents large negative (colored blue) and positive (colored red) correlations. Genes with large positive correlations correspond to small Euclidean distances and cluster together (**Supplementary Figure 11a**).

Lastly, we examine activated and repressed genes across all three repressor groups (all normalized to the negative control) by applying the limma-voom workflow. We performed linear modelling in limma, and used *lmFit* and *contrasts.fit* functions followed by empirical Bayes model, *eBayes*. This workflow removes variance-associated dependencies on the mean. In **Supplementary Figure 11b-c**, we plot genes on Venn diagrams for downregulation and upregulation where we define significance at 5% p-value with no log fold change cutoff as a less stringent method for examining transcriptome-wide transcriptional offsets for the different repressors. Based on these results, dCas9-KRAB repressor shows the largest clusters of activated genes followed by dCas9-KRAB-MeCP2, and dCas9.

**Supplemental Note 3** This section describes the methods and bioinformatics analyses we used to interpret the repressor screens in HAP1, SH-SY5Y and 293T cell lines. Related results are **Supplementary Table 4-6** and **Supplementary Data 2-4**.

### **Alignment of sequencing reads to reference contig**

The sequencing reads were aligned to a reference contig sequence (NNNNNNcccttgagaaaagccttgtttNNNNNNNNNNNNNNNNNNNNggttaagagctaga aatagcaagtttaaataaggctagtcggtatcaactgaaaaagtggcaccgagtcggtgcttttctagaccagcttctgtacaaaaaaagaattcctgcagccccgataaaaaaag) using the alignment software BWA-MEM (version 0.7.8)<sup>4</sup>. We used samtools (version 1.2) to extract aligned sequences that have a mapping quality score  $\geq 30$ <sup>5</sup>. The 20-nucleotide variable sequence was then match to the 20-nucleotide sgRNA library with 683 guide sequences. Sequences that do not match any of the 683 guide sequences were discarded from the analysis.

### **Analysis of the repressor sgRNA library**

We first sequenced the sgRNA library to determine the distribution of the guide sequences. A total 129,362 sequences map to a guide sequence within the library of 683 guides. However, 53 of the guides were severely underrepresented, i.e. less than 50 reads mapped to the guide (< 0.04%) and

they were removed from all further analysis.

### Comparing the guide sequences for all the conditions

For all the conditions, we compared the mapped guides against the corresponding control experiment. The control experiment for all the conditions is the experiment performed without any repressor, i.e. without dCas9, dCas9-KRAB or dCas9-KRAB-MeCP2. For each guide, we compared its frequency for the condition against its frequency for the control. This is done by calculating the odds-ratio (OR) for each guide using the formula,

$$OR_i = \frac{\frac{test_i}{testTotal}}{\frac{control_i}{controlTotal}}$$

where  $test_i$  is the number of reads that map to guide  $i$  for the test condition and  $control_i$  is the number of reads that map to guide  $i$  for the control while  $testTotal$  and  $controlTotal$  are the total number of reads for the test condition and control, respectively. If the guide is enriched in the test condition, the OR would be  $> 1$  while if the guide is depleted, the OR would be  $< 1$  (**Supplementary Data 2-4** list the OR and p-value of each tested guide).

### Determining if the essential guides are depleted

Out of the 630 guides from the library, 370 target essential genes (essential guides) while the remaining 260 target non-essential genes. To determine if the essential guides were significantly depleted, we performed a 1-tailed Welch T-test between the  $\log_2$  OR of the essential guides versus the  $\log_2$  OR of the non-essential guides (**Supplementary Table 4-6**). Also, for the dCas9-KRAB-MeCP2 for HAP1 day 7 and day 14, there were a number of guides that were completely depleted, ie. they had 0 reads for the test condition. This presents a problem as the  $\log_2$  OR for those guides would be  $-\infty$ . To allow for the T-test, we replaced the  $\log_2$  OR for those guides to the minimal finite  $\log_2$  OR for that condition, which is -7.61 for day 7 and -8.87 for day 14.

**Supplementary Note 4** This section describes detailed methods used to analyze the repressor-dual gRNA screen. The analysis was performed using an adapted version of a published workflow for computing genetic interactions using a combinatorial CRISPR-Cas9 knockouts<sup>6</sup> as follows.

### Read alignment

Pair-end reads were first aligned to the sequence immediately upstream and downstream of the 20 bp protospacers, thus allowing us to extract protospacer sequences from each read. The protospacer sequences were then aligned to expected sequences, allowing for 3 mismatches ( $3 < \frac{1}{2} * \min(\text{hamming}(g_i, g_j))$  for all  $i, j$ ). To ensure the robustness of the mapping, constructs with fewer than 5

reads mapped will be excluded from downstream analysis. Only when both reads in a pair were matched with a designed construct sequence was the pair considered for downstream scoring.

### Quantification of fitness and gRNA fitness and gRNA–gRNA interactions

We modeled the cell population change over the 14 day duration of the screen using an assumption of exponential growth<sup>6</sup>. For each synthesized construct, we estimated the relative abundance ( $x_c$ ) of the sub-population of cells harboring the construct. We did this by using the count of the reads that aligned to the designed construct.

$$x_c(t) = a_c + f_c t - \log_2 \sum_c 2^{a_c + f_c t}$$

In which  $a_c$  denotes the initial abundance of the construct at day 0,  $f_c$  is the fitness of the cells with the construct. Since each gene is targeted by at least 3 gRNAs, gene-gene fitness  $f_{g_i g_j}$  are calculated by collapsing  $f_c$  from all dual gRNA constructs targeting the same gene pairs.

We quantified genetic interactions as the difference between summation of single gene fitnesses and the double gene fitness, as follows:

$$f_{g_i g_j} = f_{g_i} + f_{g_j} + \pi_{g_i g_j}$$

Single gene fitnesses  $f_{g_i}$ ,  $f_{g_j}$  were obtained by fitting of above equations to the screen data. The residual of the fit,  $\pi_{g_i g_j}$ , denotes the genetic interaction score (i.e., pi-score) for a gene pair  $g_i g_j$ . Note that theoretically  $f_{g_i}$ ,  $f_{g_j}$  can be more easily obtained by measuring the fitness of the constructs that contain a negative control gene (lacZ, GFP and luc). We noticed that the negative controls lacZ and luc seemed neutral to cell fitness when a regression model was used to estimate the single gene fitnesses  $f_{g_i}$  from the fitness of all constructs  $f_{g_i g_j}$  in which  $f_{g_i}$  participates, as previously done<sup>6</sup>. Interestingly, GFP gRNAs, expected to serve as a third negative control, showed positive fitness, suggesting that the used GFP targeting guide may be hitting an off-target sequence within the mammalian genome that when mutated causes a fitness benefit. **Supplementary Data 7** lists the genetic interactions uncovered in our screen.

### Validation of genetic interaction screens by examining the topology of protein complex network and genetic interactions

We first filtered out gene-pairs that show zero interaction ( $\{g_i g_j \mid \pi_{ij} > 0\}$ ), and the shortest path was computed for the remaining gene-pairs. The shortest paths between gene pairs were computed based on a network of experimentally characterized protein complexes<sup>7</sup>. The number of intermediate genes that connect the gene pair as determined by the protein complex network is treated as the distance between the two genes ( $d_{g_i g_j}$ ).  $d_{g_i g_j}$  values are subsequently multiplied by the genetic interaction score  $\pi_{ij}$  derived from the 3 repression screens for gene-pair  $g_i g_j$  to get the enrichment score  $ES_{ij} = d_{g_i g_j} \cdot \pi_{ij}$ . The overall enrichment score can then be calculated by the summing all enrichment

scores ( $ES_{overall} = \sum_{i,j} ES_{ij}$ ). Permutation tests are performed by shuffling the genetic interaction scores and repeating the above steps for a total of 10000 permutations. As valid screen should have a smaller  $ES_{overall}$  compared to a non-valid one, left-tailed p values are reported.

**Supplementary Note 5** This section describes detailed materials and methods used to perform circuit experiments.

### Cell culture

Transfections were performed on HEK293ft cells using polyethylenimine (PEI). Cells were cultured in Debulcco's Modified Eagle Medium (DMEM), with 10% Fetal Bovine Serum (FBS), non-essential amino acids (NEAA), glutamine, sodium pyruvate, and penicillin/streptomycin. The day prior to transfection, cells were passaged and split into 24-well plates, then allowed to grow to 70-90% confluence. Mixes of DNA were used with a 2:1 PEI:DNA ratio to transfect the 90% confluent cells using standard transfection protocols. All conditions were transfected in quadruplicate. For inducible circuits, doxycycline was added to cultures to a concentration of 2000ng/uL. Media and inducers were changed daily post-transfection until flow cytometry was performed 72 hours later. In wells designated for control experiments, corresponding plasmid DNA under study was replaced by equal amount of empty DNA plasmid. 72 hours post-transfection, cells were collected for flow cytometry assay.

### Flow Cytometry and Data analysis

72 hours post-transfection, cells were trypsinized, washed with Hank's Balanced Salt Solution (HBSS) with 2% FBS, then resuspended in 200uL HBSS+FBS. Then flow cytometry was performed using a BD FACSCelesta flow cytometer. 200,000 events were collected, measuring forward scatter (FSC), side scatter (SSC), EBFP expression (BV421), and EYFP expression (BB515). Data were analyzed using FlowJo (FlowJo, LLC). For analysis, all data were compensated using single color and non-transfected controls. Cells were then gated by FSC and SSC to separate healthy, living cells from dead cells and debris. Living cells were further gated by EBFP; laser voltage was set in such a way as to make non-fluorescing cells express at  $10^2$  or lower, so the BV421 gate was set at  $10^2$ .

Cells with above  $10^2$  a.u of EBFP expression were considered transfected and were further analyzed by taking the geometric mean of the population's EYFP (BB515) expression. The geometric means of all samples were exported and further analyzed in Excel (Microsoft) or Prism (GraphPad Software). For single repression circuits, fold repression was calculated by dividing the average EYFP expression of the unrepressed samples by the EYFP of each of the four replicates. These four measures were then used to find average fold repression and standard error of the mean (s.e.m.).

For layered transcriptional repression circuits, fraction of maximum expression was calculated by dividing the average EYFP expression of the

unrepressed samples by the EYFP of each of the four replicates. These four measures were then used to find average fraction of maximum and standard deviation. For inducible layered transcriptional repression circuits, fold derepression was calculated by dividing the EYFP expression of each sample in the +Dox condition by the average EYFP expression of their No Dox counterpart. These four measures were then used to find the average fold derepression and s.e.m.

For transfections involving CXCR4 as the output, after supernatant was removed, cells in each well were labeled with 5 ul of CD184 (CXCR4) monoclonal antibody (eBioscience™) conjugated to PE and diluted (1:40) in HBSS without calcium and magnesium supplemented with 2% FBS and incubated at 4°C for 30 minutes. Cells were then centrifuged and supernatant was removed. They were then resuspended in 7-AAD solution to exclude dead cells and subjected to FACS. Flow cytometry measurements were performed using BD FACSCelesta with the following settings: EBFP measured with 405 nm laser and a 450/40 filter, EYFP measured with 488 nm laser and a 530/30 filter, 7-AAD measured with a 488 nm laser and a 695/40 filter and CXCR4 measured with 561 nm laser and a 586/15 filter. At least 300,000 events were gathered from each well. Appropriate compensation controls were dedicated for each experiment. Untransfected and unstained cells were used as negative control. Similarly, untransfected cells stained only with CD184-PE antibody were used for CXCR4 control, cells transfected only with EBFP were used as BFP controls. Finally, a mixture of live and dead cells from untransfected wells were used as 7-AAD controls. Data from flow cytometry was analyzed using FlowJo software. Briefly, live cells (7-AAD negative population) were selected and then gated for EBFP expression  $>10^3$  A.U. Geometric mean of PE fluorescence level was then calculated in this population.

### **Statistical analysis**

Statistical comparison was performed using one-tailed Student's T-test with a  $p$ -value  $< 0.05$  as the threshold for significance. In all synthetic reporter gene circuits, sample size ( $n$ ) of 4 biologically independent samples (cell cultures) was used for statistical test. In the endogenous gene circuit,  $n$  of 3 biologically independent samples (cell cultures) was used for statistical test.

## Plasmids

The plasmids used in each circuit, along with a brief description of their function, are as follows:

| Circuit                       |                     | 1   | 2   | 3   | 4   | 5   |
|-------------------------------|---------------------|-----|-----|-----|-----|-----|
| Background Plasmids and dCas9 | ND220               | 20  | 20  | 20  | 20  | 25  |
|                               | 114                 | 20  | 20  | 20  | 20  | 20  |
|                               | Csy4                |     |     | 50  | 50  |     |
|                               | dCas9 Variant       | 70  | 70  | 70  | 70  | 70  |
| gRNA repression devices       | 3475                | 100 | 200 |     |     | 500 |
|                               | LR2002              |     |     | 100 | 200 |     |
|                               | U6/Tal4-sgRNA-CXCR4 |     |     |     |     | 50  |
| TALE repressor                | 473                 |     | 50  |     | 50  | 50  |
| Reporter                      | 1341                | 20  |     | 20  |     |     |
|                               | ND252               |     | 20  |     | 20  |     |
|                               | Midi129             |     |     |     |     |     |

- dCas9 Variants: CMV promoter driving dCas9, dCas9-KRAB, or dCas9-KRAB-MeCP2 expression.
  - Background plasmids:
    1. ND220: CAG promoter driving EBFP expression. EBFP expression was used to gate transfected cells.
    2. 114: Hef1a promoter driving Gal4-VP16 and rtTA expression; the protein products are separated by a T2A amino acid sequence. The Gal4-VP16 activator binds upstream of the CRP promoter, driving its expression in the absence of a repressor. rtTA, when combined with Dox, binds upstream of the TRE promoter, driving its expression.
    3. Csy4: PGK promoter driving Csy4 expression. The Csy4 protein was used to cleave gRNAs in an mRNA transcript into functional gRNAs.
  - Regulators in single repression circuits:
    1. 3475: U6 promoter driving gRNA expression.
    2. LR2002: TRE promoter driving gRNA expression 3' to iRFP flanked by Csy4 target sites.
    3. U6/Tal14\_CXCR4 gRNA: gRNA targeting endogenous CXCR4 locus under U6 promoter (repressed by TALER).
  - Regulators in layered transcriptional repression circuits:
    1. 473: CRP promoter driving TALER expression.
  - Reporters:
    1. 1341: CRP promoter driving EYFP expression.
    2. Midi129: CRP promoter driving EYFP expression, containing two gRNA target sites flanking the mini CMV.
- ND252: pTal promoter driving EYFP expression.

## Supplementary References:

1. McCarthy, D. J., Chen, Y, and Smyth, G. K. Differential Expression Analysis of Multifactor RNA-Seq Experiments with Respect to Biological Variation. *Nucleic Acids Research* **40**, 4288–97 (2012).
2. Lund, S. P., Nettleton, D, McCarthy, D. J., and Smyth, G. K. Detecting Differential Expression in RNA-Sequence Data Using Quasi-Likelihood with Shrunken Dispersion Estimates. *Statistical Applications in Genetics and Molecular Biology* **11**, Article 8 (2012).
3. McCarthy, D. J., and Smyth, G. K. Testing Significance Relative to a Fold-Change Threshold Is a TREAT. *Bioinformatics* **25**, 765–71 (2009).
4. Li, H. Aligning sequence reads, clone sequences and assembly contigs with BWA-MEM. *ArXiv13033997 Q-Bio* (2013).
5. Li, H. *et al.* The Sequence Alignment/Map format and SAMtools. *Bioinforma. Oxf. Engl.* **25**, 2078–2079 (2009).
6. Shen, JP *et al.* Combinatorial CRISPR-Cas9 screens for de novo mapping of genetic interactions. *Nat Methods.* **14**, 573-576 (2017).
7. Ruepp, A *et al.* CORUM: the comprehensive resource of mammalian protein complexes--2009. *Nucleic Acids Res.* **38** (Database issue), D497-501 (2010).

**Supplementary Data 1** A list of differentially expressed genes considered significant at FDR < 0.05 in the RNA-seq experiment.

**Supplementary Data 2** A list of all sgRNA sequences in single guide RNA library and their log2 odd ratios in HAP1 lethality screen.

**Supplementary Data 3** A list of all sgRNA sequences in single guide RNA library and their log2 odd ratios in SH-SY5Y lethality screen.

**Supplementary Data 4** A list of all sgRNA sequences in single guide RNA library and their log2 odd ratios in 293T lethality screen.

**Supplementary Data 5** A list of non-essential gene-targeting sgRNAs that showed depletion in lethality screens.

**Supplementary Data 6** Summary of rank-ordered genes identified from sgRNA enrichment analysis performed using MAGeCK software.

**Supplementary Data 7** Genetic interactions captured through repressor screens.

**Supplementary Data 8** DNA sequences and species origins of all protein domains used to construct the different repressors in this study.
